# Supplementary material
Source: PubMed Central journal article supplement (PMC3540207)
Supplement: NIHMS411280-supplement-1.pdf [file NIHMS411280-supplement-1.pdf]

## **Supplementary Information**

### **Structure of the human ATG12~ATG5 conjugate required for LC3 lipidation in autophagy**

Chinatsu Otomo, Zoltan Metlagel, Giichi Takaesu, and Takanori Otomo

**Supplementary Figures 1–5**

**Supplementary Note**

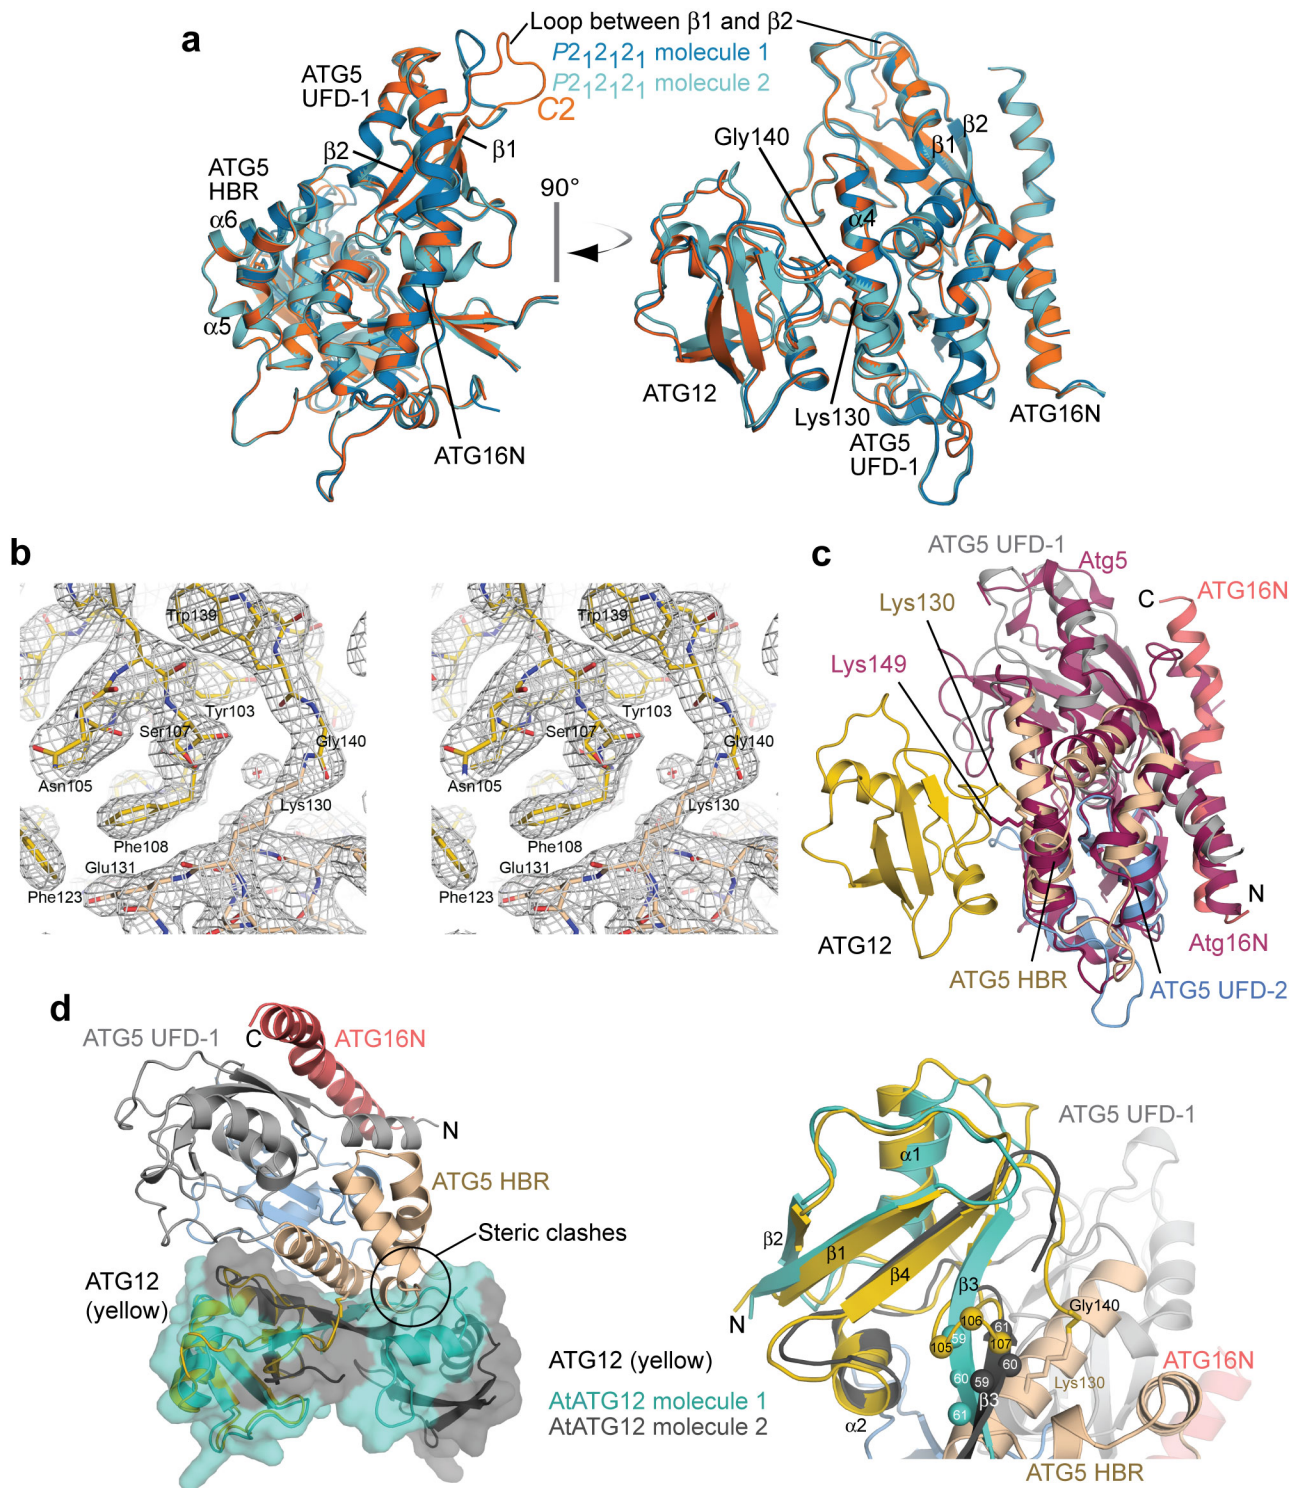

**Supplementary Figure 1** Structural comparisons of the ATG12~ATG5~ATG16N complex with related structures. **(a)** Overlay of the crystal structures of the ATG12~ATG5~ATG16N complex. The molecules 1 and 2 in  $P2_12_12_1$  structure are shown in blue and light blue, respectively, and the structure from the C2 data is in

orange. The pair-wise r.m.s.d.s of all C $\alpha$  atoms between two of the three structures are 0.86 Å, 1.07 Å, and 1.18 Å between  $P2_12_12_1$  molecules 1 and 2,  $P2_12_12_1$  molecule 1 and C2 structure, and  $P2_12_12_1$  molecule 2 and C2 structure, respectively. The location of the loop between  $\beta 1$  and  $\beta 2$  of UFD-1 in ATG5, which is the only appreciable difference between the  $P2_12_12_1$  and C2 structures, is indicated. (b) Stereo view of the simulated annealing omit map (contoured at  $1.5\sigma$ ) calculated using a model lacking ATG12 Gly140 and ATG5 Lys130 is shown with the final complete model. (c) Overlay of the yeast Atg5–Atg16N complex (PDB ID: 2DYO) on the ATG12~ATG5–ATG16N structure. Atg5–Atg16N is shown in magenta and ATG12~ATG5–ATG16N is in the same colors as in **Figure 2**. The average pair-wise r.m.s.d. of the C $\alpha$  atoms between the Atg5–Atg16N complex and the ATG5–ATG16N part of the complex is 3.45 Å. (d) Overlay of AtATG12b domain-swapped dimer (PDB ID: 1WZ3) on the ATG12~ATG5–ATG16N structure. An overview with surface representation for AtATG12b is shown in the left panel. Steric clashes between the HBR of ATG5 and molecule 1 (turquoise) of AtATG12b dimer are indicated. An enlarged view is shown in the right panel. Each of the two molecules of AtATG12b dimer is shown in turquoise or dark gray. The “turn-loop-turn- $\alpha 2$ - $\beta 4$ -tail” segments following  $\beta 3$  strands are swapped in the AtATG12b dimer. The extended  $\beta 3$  strands from both molecules form a  $\beta$  sheet by interacting each other. The three residues in the first turn of the “turn-loop-turn- $\alpha 2$ - $\beta 4$ -tail” segment of ATG12 (Asn105-Gln106-Ser107) as well as the corresponding ones in the extended  $\beta 3$  of AtATG12b (Asn59-Ser60-Ala61) are indicated with C $\alpha$  spheres. The average pair-wise r.m.s.d. of all C $\alpha$  atoms between ATG12 and the “monomeric” AtATG12b is 1.8 Å.

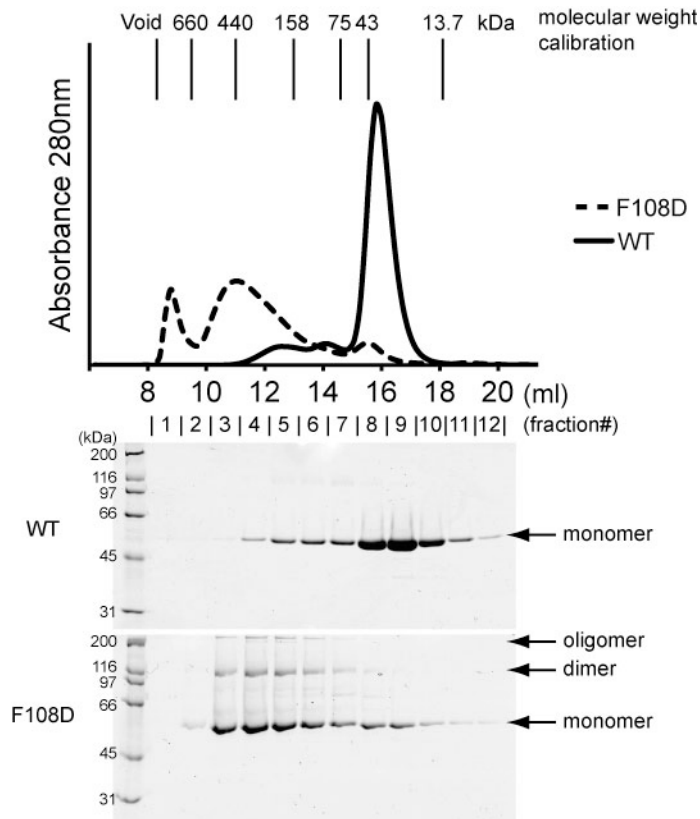

**Supplementary Figure 2** The F108 mutation in ATG12 causes aggregation of the recombinant ATG12 protein. The size exclusion column profiles of recombinant maltose binding protein-fused wild-type ATG12 or ATG12 F108D protein are shown. One hundred  $\mu\text{L}$  of 10  $\mu\text{M}$  protein was injected into a Superdex 200 gel filtration column equilibrated with 10 mM Hepes, pH 7.0, 300 mM NaCl, and 1 mM DTT (top). SDS-PAGE gels for the fractions are shown in the bottom panels. The data indicate that high-molecular-weight species of ATG12 including SDS-resistant dimers and oligomers are generated by the F108D mutation. The wild-type ATG12 also exhibits an aggregation tendency.

**a** Without ATG12~ATG5-ATG16N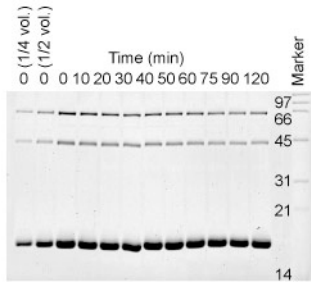**b** Wild-type ATG12~ATG5-ATG16N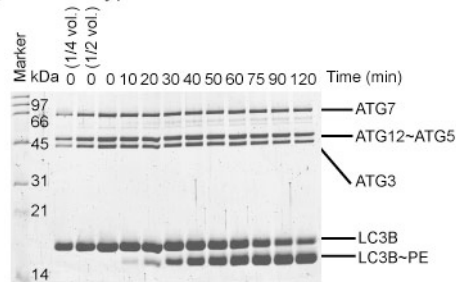**c**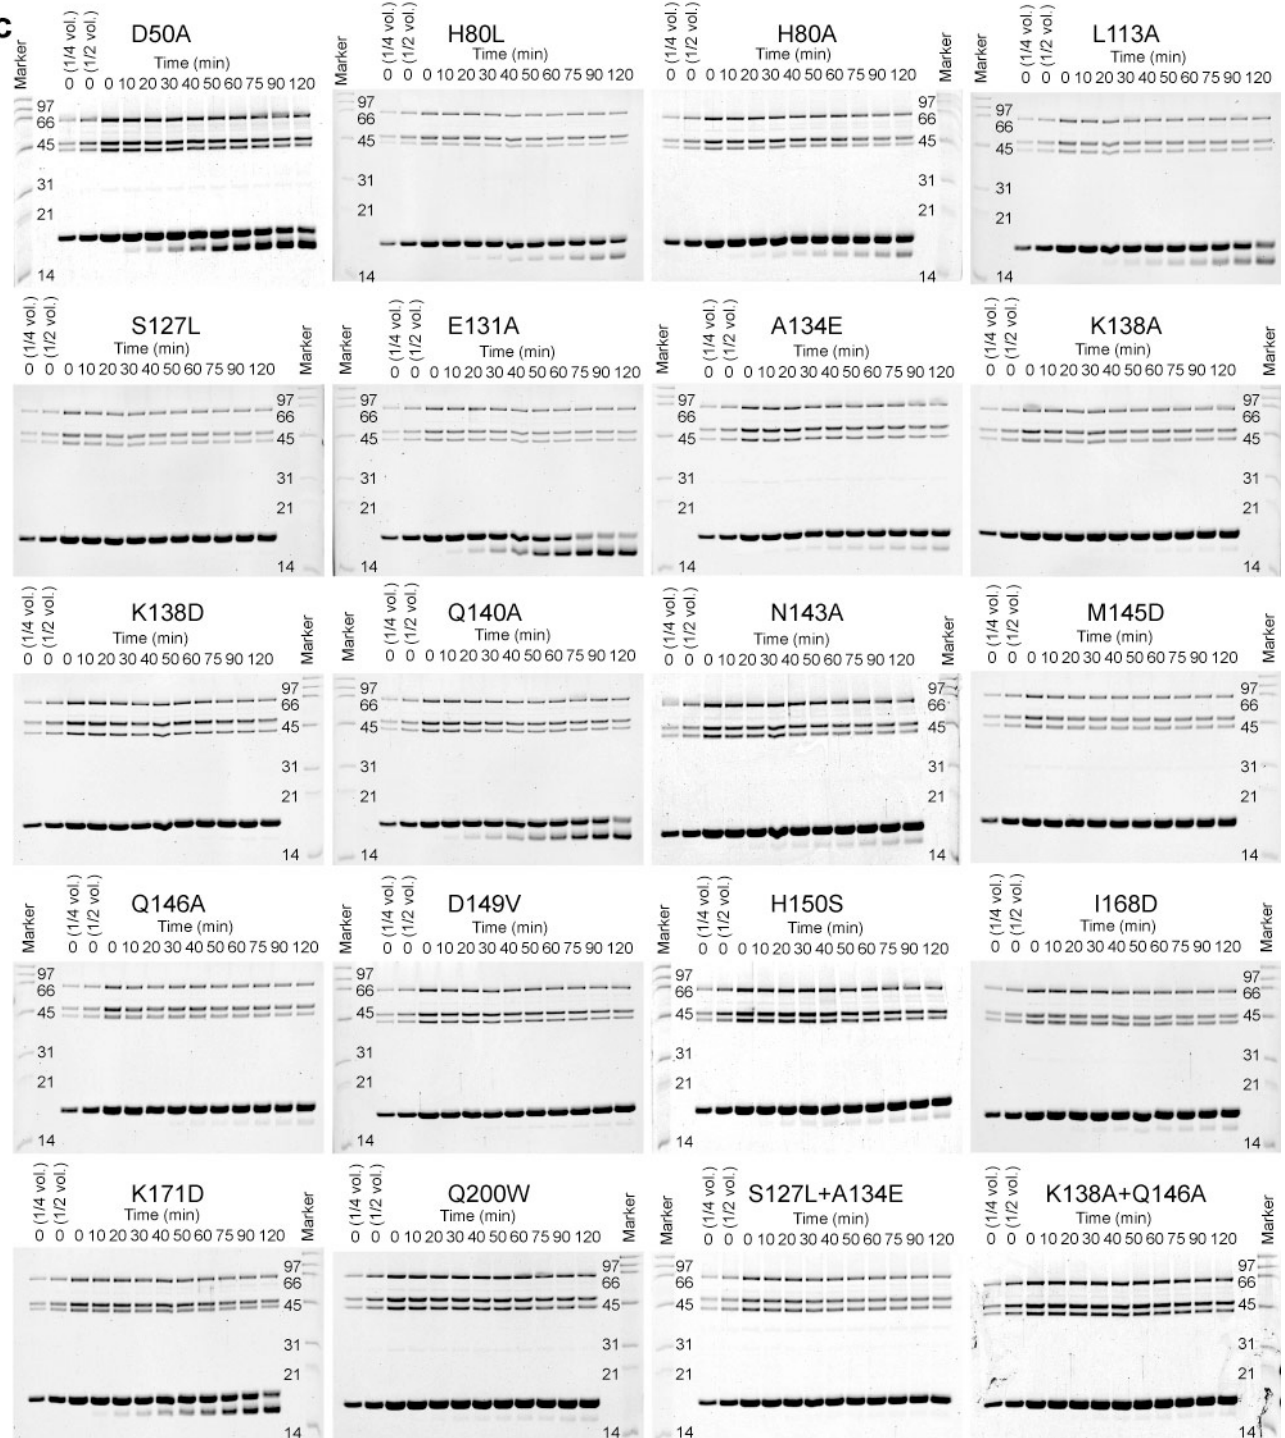

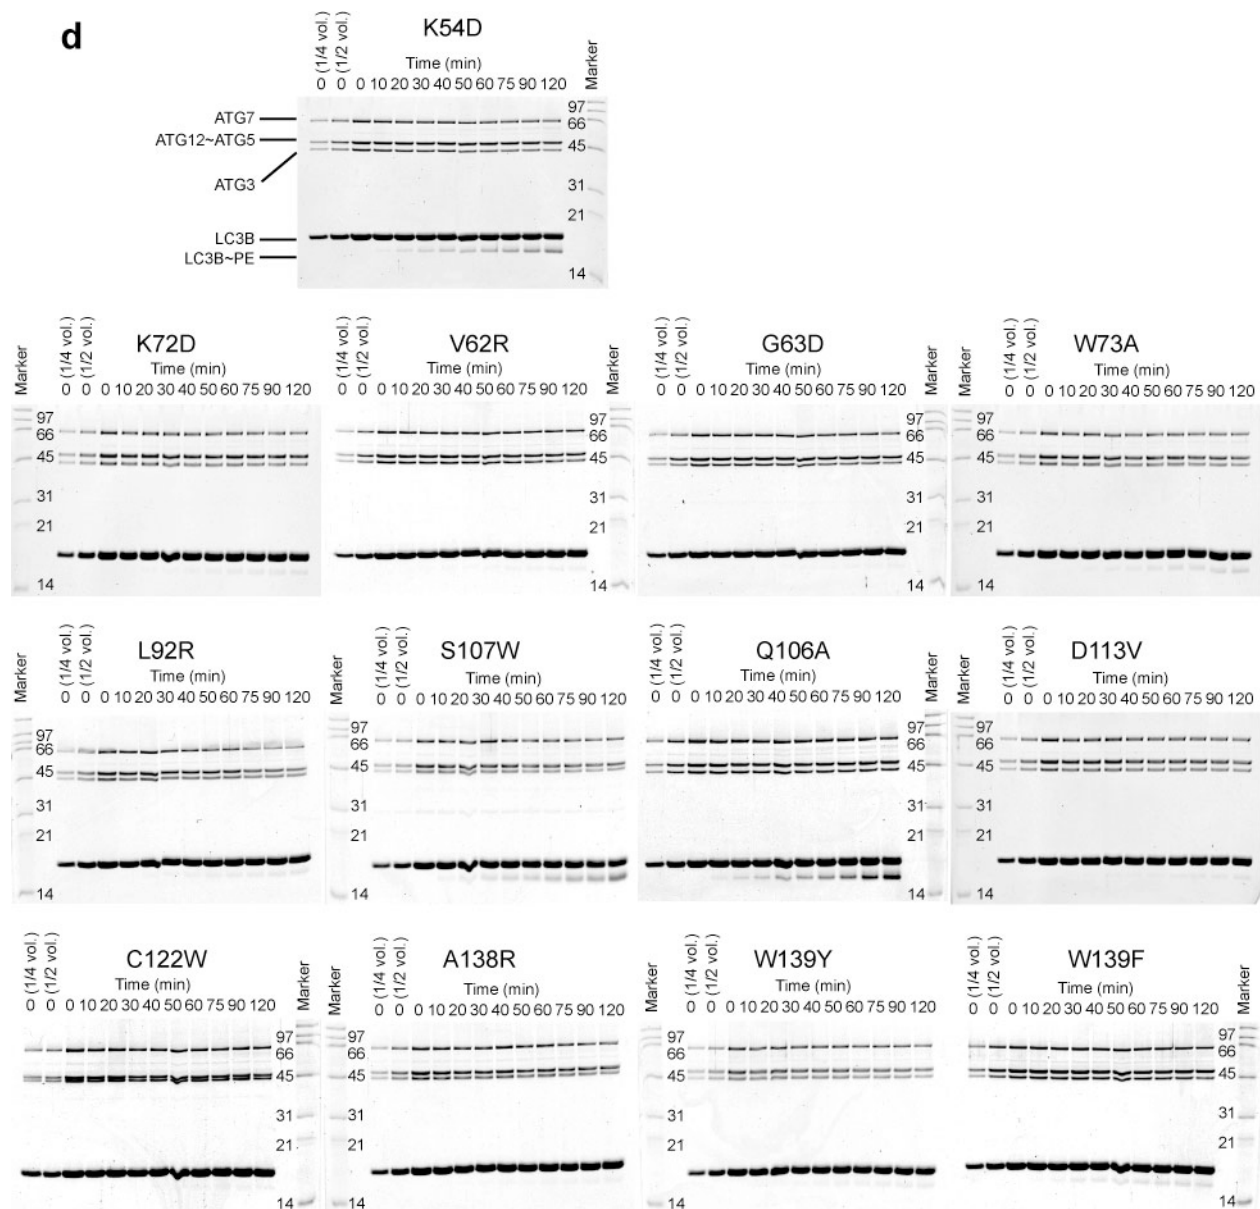

**Supplementary Figure 3** SDS-PAGE gels of *in vitro* LC3 lipidation assays carried out with mutant ATG12~ATG5-ATG16N complexes. (a-d) Kinetic LC3B~phosphatidylethanolamine formation assays were performed in the absence of the ATG12~ATG5-ATG16N complex (a), or in the presence of the wild-type complex (b) or complexes containing mutations in ATG5 (c) or ATG12 (d). The same assay condition as described in **Figure 1a** was used in these experiments. The bands corresponding LC3B~phosphatidylethanolamine conjugate were quantified as described in Supplemental Experimental Procedures and are reported in **Figures 4b,4c**.

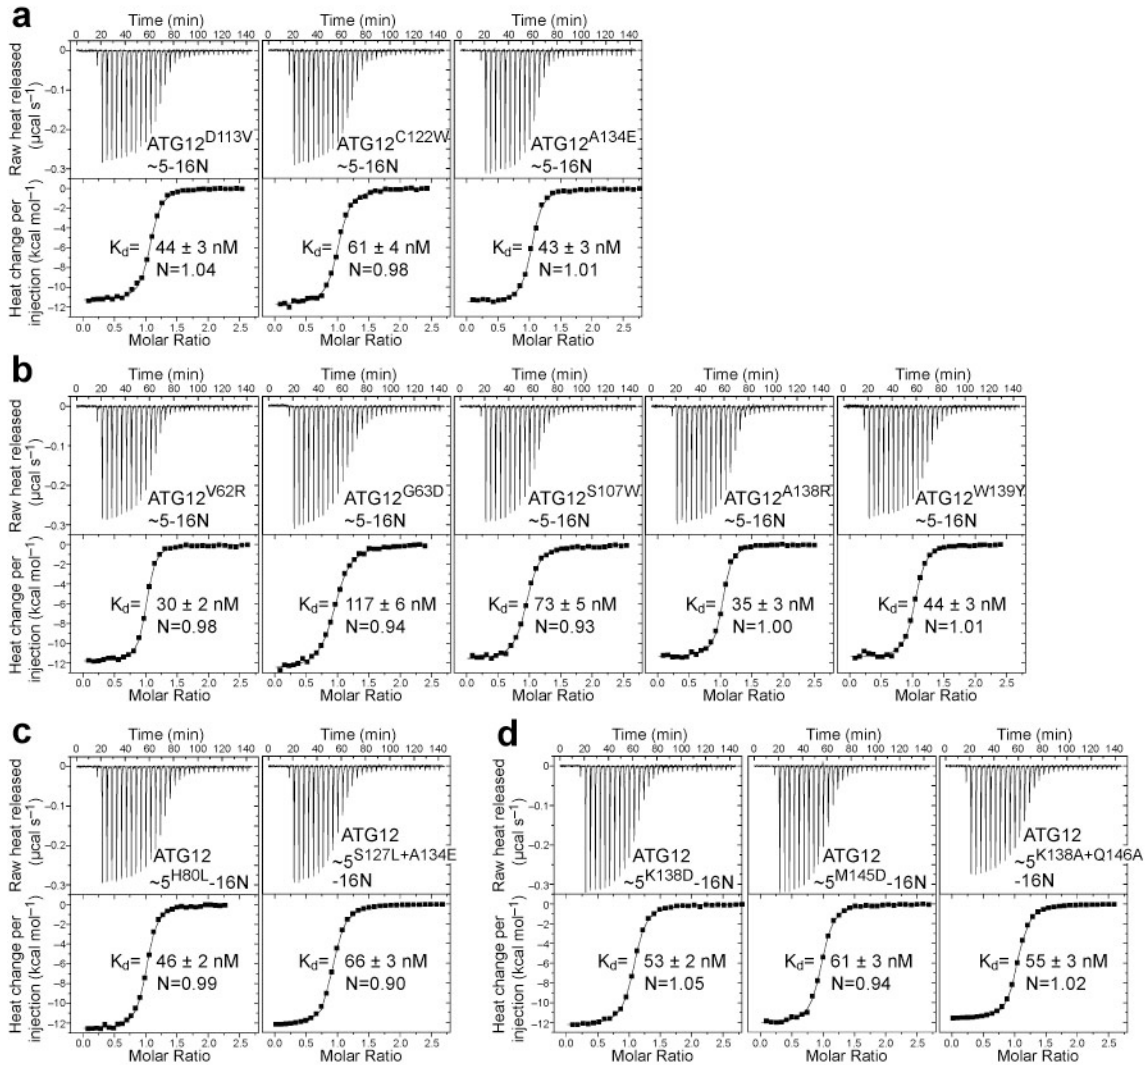

**Supplementary Figure 4** ITC data for the ATG12~ATG5-ATG16N mutant complexes showing no major effects of the mutations on the high-affinity binding to ATG3. **(a-d)** ATG3 was injected into cells filled with solutions containing mutant ATG12~ATG5-ATG16N complexes that have mutations in ATG12 at the interface to ATG5 **(a)** or on the exposed surface **(b)**, or in ATG5 at the interface to ATG12 **(c)** or on the exposed surface **(d)**.



# ConSurf color-coded MSA of ATG12 family members

A1DMW6|ATG12\_NEOFI|86-174  
 F4Q8X1|F4Q8X1\_DICFS|55-143  
 Q9US24|ATG12\_SCHPO|44-132  
 A5E1F1|ATG12\_LODEL|122-210  
 A8E622|A8E622\_XENLA|44-132  
 Q6CUD5|ATG12\_KLULA|104-189  
 Q8S924|AT12A\_ARATH|11-96  
 Q1E8C2|ATG12\_COCIM|84-182  
 A7RKL8|A7RKL8\_NEMVE|42-130  
 Q2GSG9|ATG12\_CHAGB|61-150  
 DONGS1|DONGS1\_PHYTT|19-107  
 F4P6R0|F4P6R0\_BATDJ|35-122  
 Q9LVK3|AT12B\_ARATH|9-94  
 Q5DBF6|Q5DBF6\_SCHJA|19-107  
 E1ZS57|E1ZS57\_CHLVA|7-90  
 F4S4Q5|F4S4Q5\_MELLP|24-112  
 B5FX55|B5FX55\_TAEGU|55-143  
 A5DK05|ATG12\_PICGU|126-213  
 E3LYX8|E3LYX8\_CAERE|29-121  
 POCM28|ATG12\_CRYNJ|17-105  
 E4WS37|E4WS37\_OIKDI|6-94  
 O94817|ATG12\_HUMAN|52-140  
 E2AU17|E2AU17\_CAMFO|50-138  
 P38316|ATG12\_YEAST|101-186  
 C1E900|C1E900\_MICSR|15-105  
 Q16WV3|Q16WV3\_AEDAE|32-120  
 A2FHD3|A2FHD3\_TRIVA|2-90  
 B3RQ28|B3RQ28\_TRIAD|21-109  
 Q01783|Q01783\_OSTTA|374-463  
 E9FT90|E9FT90\_DAPPU|52-138  
 Q4V6A9|APG12\_DROME|23-111  
 A7M6G8|A7M6G8\_HAELO|48-136  
 Q10931|Q10931\_CAELI|26-118  
 Q6BU30|ATG12\_DEBHA|66-153  
 Q51P78|ATG12\_MAGGR|91-181  
 A4RYE8|A4RYE8\_OSTLU|8-97  
 F1Q9E0|F1Q9E0\_DANRE|32-120  
 A8QF10|A8QF10\_BRUMA|4-93  
 B8C4Q5|B8C4Q5\_THAPS|3-91  
 E7EL65|E7EL65\_ACACA|32-120  
 E3QRN4|E3QRN4\_COLGM|61-150  
 Q2TBJ5|ATG12\_RAT|53-141  
 A7KAJ7|ATG12\_PICAN|83-167  
 E0VIX4|E0VIX4\_PEDHC|39-127  
 A2YAG8|ATG12\_ORYSI|8-93  
 D2A2F4|D2A2F4\_TRICA|36-124  
 Q6BZ21|ATG12\_YARLI|115-205  
 Q86CR6|ATG12\_DICDI|36-124  
 A7EAE5|ATG12\_SCLS1|26-120  
 F1LC16|F1LC16\_ASCSU|3-92

TGKVTVRFQPLP-SAPILKNRVFKISAS-QFETVVKFLRKKLDCKD---  
 RDSIIIFYKNAG-SAPALKQKFKLQAT-LFQHVVDNLRKQLKMKP---  
 NRRVNLRFKAIG-RTELLRKTVFSINAS-QFEKVTFRLLKGLPMN---  
 PEKVTIRFPQPIG-STTAIHPKVKFISVSV-QILTVNRFLSQKLNNE---  
 KRKKIDVLLKAVG-DTFIMKTKKWTIEKT-RVQGLMDFIKKYLKMDA---  
 QVKKVIRLQPIG-AFPIQIQRVQCSIAH-QFLALTRFLCKRKLKRRK---  
 VRKVVVHLRATG-GAFILKQSKFKIPGT-DFAKVIDFLRRQLHSD---  
 AGKVVVRFHPLP-SAFILRNRVFKISAS-QFETVVKFLRKKLDCKE---  
 KDKVEVLLKAAAG-DAFIMKRRKWAVERGS-KVAYLLEFIRKXIRCEP---  
 QEKVVVRFPRVVG-SAFAIRRDLVKVI-ST-HFDSVVAFLRKKMLKQVPE---  
 PTKVTLQFVAVG-SAPLMKRTKFTVIGH-DLSVVKFLRKLQRLKQ---  
 PDKVVVRLKATG-SAPILKQTVFKISSS-SFQNVIAFLRKLALAYKQ---  
 VQKIVVHLRATG-GAFILKQSKFKVSGS-DFANVIDFLRRQLHSD---  
 LDKVILLKAAAG-NAFVMMKKKWSVRK-QIHWVDFIRKXISCDP---  
 DSKVVVRFKATG-DAPILKQNKIDGQER--FAKLVDFLRRKLLGR---  
 LSKVVVRFKATG-AAFIMKQNFYKITAS-NFQTVIAFLRKLGLKLF---  
 RKKKIDVLLKAVG-DTFIMRTRKWAVER-T-RIQGLVDFIKKFLKMA---  
 ATKIVVHLRATG-STRAITPKVLQVSD-NFVAVLMRFIAKRLRIST---  
 LKKVTIKLKNIG-DAPVLLKKNKLVKST-DLASLKVFLRKLNLPL---  
 QPAVVVRFKATG-SAFIMKNNVFKATAG-HFQAVIMFLRKLGLMFL---  
 QEKVEILLRAVG-DAPVLLKKNKFLNRT-QIAFVSDFLRKLKCED---  
 KRKKIDVLLKAVG-DTFIMKTKKWAVER-T-RIQGLVDFIKKFLKMA---  
 KTKVIDLLKATA-NAFIMKQKWSVVD-NIGRISSEFIAKRLKLDP---  
 LQKIQIKFQPIG-SIQGLKPSVCKIAMS-QFAMVILFLRKLKMDH---  
 VDKVILLKATG-DAPILKQNKFKITAS-DFEKVVQFLRKLKPKQIG---  
 TKKIDVLLKATG-SAPILKQKWAVERQEK-KISAIKFIHKYKLEP---  
 EKKVTFLLNSAS-DLQVSKNKTSLRSG-KMLFLVRYVKKKLNIQG---  
 KRKKIDVLLKAVG-DAPILKQKWSVVD-KVWVVIDFLRRYLKCPQ---  
 ERKVVVLFKATG-DAPILRNRVVKIRAS-AFEEILAHLTKSTRCER---  
 TFKIVVLCVPG-GAFIMRQRKWEVDST-QIGFIASFIRKLLTLQK---  
 GSKICILLNATG-NVFIKKRTWTVPFN-KVWGIQTFIHKFLKLDL---  
 KRKKIDVLLKATG-DAPIMKRRKWSVSPQ-MIMEIADFIRKYLKLGQ---  
 SDKVVVRLRNIADAPVLLKNNKVVNPT-DVASFILKRLKLLNIQAN---  
 IFKVTIRFPQPIG-STFSINPRVFKISSN-QISTISKFLIKRLLKIKS---  
 DQKVVVRFKPVGGSAPALRKLCKISAA-QFEAVVYLRRLTKVGN---  
 SRRVVVLFKATG-DAPILRQNKVVRAD-AFEDVVAHLSKLLKRE---  
 KRKKIDVLLKAVG-DTFIMKTKKWSVER-RIQSLAQFISRFKLEP---  
 NAKVEILLKAVG-DAPILKQNKWTVDEK-KVAELCIFLRSYMKLND---  
 TSRVVFHFAVG-SAPILKSKKFLIGED-DFGVATAFLRLLRLDLS---  
 DQKVVVLFKAVG-GASALKVKNFKLQAK-AFQFVIDFLRKLQKCF---  
 SEKVVVLFKAVG-NAFSLTRGVAKISST-QFHTVWYLRRLKLEP---  
 KRKKIDVLLKAVG-DTFIMKTKKWAVER-T-RVQALIDFIRKLLQLLA---  
 ESKIQIRFKSIG-SVDQVSPAVFKISKS-SFSSILRFLEKLGK---  
 KRKKIDVLLKATG-NAFIMKRRKWSVVDNE-KRIGSVVEFIRKYLRLP---  
 QKVVVHFRSTG-NAFQKQSKFKIIGNE-EFLKIDFLRRQIHQD---  
 KRKKIDVLLKPTG-NAFIMKRRKWTVEGD-KISWIAEFMKRYMKLEP---  
 NKKCQLKFRPIGATFSLKQSVYKIAET-QFGVVVKFLRKLKIKNSQ---  
 ESKIIIVYFKNAG-GAQPLKQKFKIQAN-VFQNVIDKLRGQLKLS---  
 TAKITVRFQPIG-SAPILQRPVSKISSSQQFETVVAFLRRLVLLKDRKGG  
 AGKVEILLKAVG-DAPIMKQSKWVDSK-KIAELTAFVVRQYLKVDL---

A1DMW6|ATG12\_NEOFI|86-174  
 F4Q8X1|F4Q8X1\_DICFS|55-143  
 Q9US24|ATG12\_SCHPO|44-132  
 A5E1F1|ATG12\_LODEL|122-210  
 A8E622|A8E622\_XENLA|44-132  
 Q6CUD5|ATG12\_KLULA|104-189  
 Q8S924|AT12A\_ARATH|11-96  
 Q1E8C2|ATG12\_COCIM|84-182  
 A7RKL8|A7RKL8\_NEMVE|42-130  
 Q2GSG9|ATG12\_CHAGB|61-150  
 DONGS1|DONGS1\_PHYTT|19-107  
 F4P6R0|F4P6R0\_BATDJ|35-122  
 Q9LVK3|AT12B\_ARATH|9-94  
 Q5DBF6|Q5DBF6\_SCHJA|19-107  
 E1ZS57|E1ZS57\_CHLVA|7-90  
 F4S4Q5|F4S4Q5\_MELLP|24-112  
 B5FX55|B5FX55\_TAEGU|55-143  
 A5DK05|ATG12\_PICGU|126-213  
 E3LYX8|E3LYX8\_CAERE|29-121  
 POCM28|ATG12\_CRYNJ|17-105  
 E4WS37|E4WS37\_OIKDI|6-94  
 O94817|ATG12\_HUMAN|52-140  
 E2AU17|E2AU17\_CAMFO|50-138  
 P38316|ATG12\_YEAST|101-186  
 C1E900|C1E900\_MICSR|15-105  
 Q16WV3|Q16WV3\_AEDAE|32-120  
 A2FHD3|A2FHD3\_TRIVA|2-90  
 B3RQ28|B3RQ28\_TRIAD|21-109  
 Q01783|Q01783\_OSTTA|374-463  
 E9FT90|E9FT90\_DAPPU|52-138  
 Q4V6A9|APG12\_DROME|23-111  
 A7M6G8|A7M6G8\_HAELO|48-136  
 Q10931|Q10931\_CAELI|26-118  
 Q6BU30|ATG12\_DEBHA|66-153  
 Q51P78|ATG12\_MAGGR|91-181  
 A4RYE8|A4RYE8\_OSTLU|8-97  
 F1Q9E0|F1Q9E0\_DANRE|32-120  
 A8QF10|A8QF10\_BRUMA|4-93  
 B8C4Q5|B8C4Q5\_THAPS|3-91  
 E7EL65|E7EL65\_ACACA|32-120  
 E3QRN4|E3QRN4\_COLGM|61-150  
 Q2TBJ5|ATG12\_RAT|53-141  
 A7KAJ7|ATG12\_PICAN|83-167  
 E0VIX4|E0VIX4\_PEDHC|39-127  
 A2YAG8|ATG12\_ORYSI|8-93  
 D2A2F4|D2A2F4\_TRICA|36-124  
 Q6BZ21|ATG12\_YARLI|115-205  
 Q86CR6|ATG12\_DICDI|36-124  
 A7EAE5|ATG12\_SCLS1|26-120  
 F1LC16|F1LC16\_ASCSU|3-92

-TDSVFCYVNSVFA PGLDEGVGGIWRRCFKTD----DQLIVSYSMTFAFG  
 -NEPLFLFCVNVQVQPSPECLSEFLKCFSHN----DQLVNVYSNAPAFG  
 ---SSLVLLVNSSFA PSPDEIVGNLYDNFAID----SHLLINYCINVAFG  
 -RQPLHLFYIQNSFLSPDERVGDLYALFATN----HELISYCNCTIAFG  
 -VEQIFTYVNVQSFAPSPDQEVGLYECFGSD----GKLVLYCKSQAFG  
 ---ILFCYINNAFA PSLDQNSIGLWTFQKVN----DELIVSYCETVAFG  
 ---SHPYVNSAFA PNPDESVIDLNNYFDFD----GKLVVNYACSMVAFG  
 -SDSVFCYVNSVFA PGLDESVGGIWRRCFKTD----DQLIVSYSMTFAFG  
 -SESLFLYVVGQAFAPSPDQLVSNLYWCFDAD----GKLVLYCKSQAFG  
 -TDGVFLYINNTFA PALDEVVGILWRRCFKDSS----DHLIVSYSMSPAFG  
 -SESLFLYVNSVFA PSLDQRLSSLFESFQVGV----DGLVLYNSLTPAFG  
 -GTMFVYVNSVFA PNPDEQIDLYNRCFAID----GKLVNYSITPAFG  
 ---SLFVYVNSAFA PNPDESVIDLNNYFDFD----GKLVVNYACSMVAFG  
 -SESLFLYVNVQFA PAMPDAEIGSLYDCFSVE----GKLVLYCKTQAFG  
 ---DQVFMYLKEAFAPSPDERIATLHDAFAVD----GRLVVNYALTPAFG  
 -SDSVFLYINNSVFA PDPDVTVNLKFCFSTD----GHLVNYSSTAQAFG  
 -SEQLFLYVNVQSFAPSPDQEVGLYECFGSD----GKLVLYCKTQAFG  
 ---DSVYMIHNTFOPTPDERLGLDYDFRTN----QELIFNYCNTVAFG  
 -NDSLFLYIDNNAFA PSLDCTFESLRCYSVRSRSTGDEVLLEIYQSIPTAFG  
 -EDSLFTYINAAFA PAPPDVTGSLVKSFGTE----GHLVINYNSNTQAFG  
 -EERIFLYIHQAFA PPTMDSPIGTLFDNHASD----NKLIVHYKSTPAFG  
 -SEQLFLYVNVQSFAPSPDQEVGLYECFGSD----GKLVLYCKSQAFG  
 -NERLFLYVNVQFA PAPPDQTVKLLYDCYAGD----GKLVHYCKSQAFG  
 ---VYCYINNSFA PNPQNIIGLWQCFKTN----DELIVSYCASVAFG  
 ADGRVFLVNSAFA PTRYDEKVANLYAWHVE----GKLVVNYALQAFG  
 -GEKFLFLYINQTFAPSPDQIKKLYDICYGAN----GKLVLYYAKSQAFG  
 -NQSIIHLFFNNFA IYPTWTAGVADHSPGQ----TLDIYSSSGVFG  
 -SESLFLYVNVQFA PPSADQISIRNLYQCFAD----GKLVLYCKTQAFG  
 ---AFAYLGAFA PPRYDQITIGALCDGYGERNDEGKLVVYVSTPAFG  
 -SDSLFLYVNVQSFAPSLDQTVQNLDFDCFGSD----GKLVLYCKTQAFG  
 -SEQLFLYVNVQFA PAPPDQIKKLYECHGNT----GKLVLYYCKNQAFG  
 -SESLFLYINQVFA PSLDQEISNLYECFGSN----GKLVLYYAKSHAFG  
 ---NSLFLYIDNTFA PSPDTFETLRYCSYVKITDKEILDLQYSITPAFG  
 ---NLIIYLYIQNSFA PNPDEKLGLDYHLFKTN----NELIINYCHSITAFG  
 -GESVFLYINSTFA PALDEIVGNLHRCFKDSN----GQLNIVSYSMTFAFG  
 ---RAFAYLGAFA PPRYDARVAGLCDGYGERNDEGKLVVYVSTPAFG  
 -SEQLFLYVNVQSFAPSPDQEVGLDFECFGSD----GKLVLYCKSQAFG  
 -SDSLFLYINQVFA PPSADQTVRNLKDCFPAGD----SKLVNYSKTQAFG  
 -APSLFLYINAAFA PPSDERIGLDYDCFGVVR----GKLVHYSLQCAFG  
 -TDLFLFLVNGAFA PNPDEVIADLHCKFHNS----GQLVINYCTPAFG  
 -TDSVFCYVNSVFA PSLDQIVGNLHRCFKDSN----SQGLVIVSYMNPVAFG  
 -SEQLFLYVNVQSFAPSPDQEVGLDYECFGSD----GKLVLYYCKSQAFG  
 ---VYCYLNNVFA PNPDEBLELNYNIFRVG----DELIVSYCNTVAFG  
 -SENLFYVNVQSFAPSPDQIKKLYDICYGSD----GKLVLYCKTQAFG  
 ---TVFLYVNSAFA PNPDELIIDYNNFGID----GKLVVNYASSMAFG  
 -QEKFLYVNVQFA PPSADQIKKLYDCYSTE----GKLVLYCKTQAFG  
 -SSQIFCYIISFA PGLDVTGSLYNNYAIR----GELTISYCLNQAFG  
 -NESLFLYINQVFA PPSDEILGELYKCFSHN----DQLIINYSLQMAFG  
 EGDVFLYVNSVFA PALDEVVGILWRRCFKDSN----KQGLVYVSYMTPAFG  
 -SESVFLYVNVQFA PPSDQTLANLYECFASAD----SKLVLYYKMNQAFG

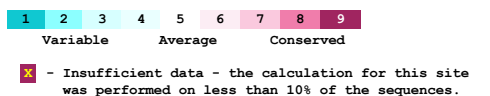



## ConSurf color-coded MSA for ATG5 family members

```

E9H8N6|E9H8N6_DAPPU|1-271  MAEDREILREIWEGRLEFVCFTLAATEEVS--TPIAPDPFY--LMVPRLTIFY
Q1DP17|ATG5_COCIM|5-351  SASTSAIQQRVWQGRIFLQIVLSPSECRI--YDQSDPYI--ISIFRLSYF
Q9W3R7|ATG5_DROME|1-269  MAHDREVLRLMIWEGQIGICFOADRDEIVG---IKPEFFY--LMISRLSYL
Q4WNA5|ATG5_ASPFU|10-326  QVLSLSIQRAVWDGKLFLEITLASESRT--YDQTDPLY--IACPRISYF
A6RE26|ATG5_AJECN|5-333  TPAPSAIQRRVWEGRIPLLEITLSPAEACRT--YDKADPYL--ICYFRYSYF
E2BV18|E2BV18_HARSA|1-265  MANDREMLREIWDGKIPVCFTLDSSEETC--ELQGPDPFY--LMVPRLSYF
Q3MQ02|Q3MQ02_XENLA|1-276  MTDDKDVLRDVFGRIFTCFTLYQDELT--EREAEFYY--RLLFRVSYL
Q3MQ23|Q3MQ23_CIOSA|1-266  ---MTEIPRKLWEGKIPACFNLASYEVC--STKAPAPVY--LMLFRSAYL
Q75BY9|ATG5_ASHGO|1-288  MGVVNELRQRTWSGMLNVEVVLNPKLVVQGMPEQVQRCH--LRIFRESYF
Q3MQ11|Q3MQ11_GASAC|1-275  MADDKDVLRDVFGRIFSCFTLNQDEVT--EREAEFYY--LLEFRVSYL
Q9FFI2|ATG5_ARATH|1-336  --MAKEAVKYVWEGAIPLQIHLHKSDDVAS--HPAPFPAL--VLAPRIGYL
C1BTY2|C1BTY2_9MAXI|1-273  MSDEDREVLREIWEKGIPIRFLNLDGDFG----GVSEPFY--LMLFRQSYL
E0VWT9|E0VWT9_PEDHC|1-266  MATDREVLREVWEGRLPISFRLLDDVH--GLREPDPVY--LLEFRLSYF
A7KAI4|ATG5_PICAN|1-275  -MSTSEIISRVWGVGLVMQFHLDRALSNQ----ECPSFY--VAVHRNSYF
Q6BV18|ATG5_DEBHA|4-288  SNELIEIKDKLWNGSINVRILMGDDNIDK----PKFEL--ITVYRNSYF
Q2UBM1|ATG5_ASPOR|4-322  QATLNSIQKAVWDGRLFLQIRLAPSESRI--YDQTDPLY--ISYFRISYF
Q9H1Y0|ATG5_HUMAN|1-275  MTDDKDVLRDVFGRIFTCFTLYQDEITE--EREAEFYY--LLEFRVSYL
C4QII2|C4QII2_SCHMA|163-515  CMTDSNILKRWEGKVPACFTLALLEDLAHE-DHAPFPYI--MFLFRVSYF
A5DC23|ATG5_PICGU|1-258  MPLEQDKLHWNGAINIVIVY----NEQYQL--VRAHRNSYF
COHB55|COHB55_SALSA|1-275  MADDKDVLRDVFGRIFTCFTLYQDEIT--EREAEFYY--LLEFRVSYL
Q3MQ08|Q3MQ08_ORYLA|1-275  MADDKDVLRDVFGRIFTCFTLNQDEVT--EREAEFYY--LLEFRVSYL
F1RDC0|F1RDC0_DANRE|2-275  MADDKDVLRDVFGRIFACFTLSDPETE--REAEFYY--LLEFRVSYL
Q17IN4|Q17IN4_AEDAE|1-265  MANDREILREIWEKGIPIVQFLASDET--DVPPEQFF--LLEFRLSYF
A7SNR5|A7SNR5_NEMVE|1-276  MAEDREVLREIWDGRLFVCFNLTSDEVVSM--EQPEPYVSLVFRNLNYL
A7TS83|ATG5_VANPO|1-290  --MDELRLKLVWDGKINVQIADVNPQLLVKGINEKDDVTVN--LRIFRNAYL
C1BN90|C1BN90_9MAXI|1-274  MSDEDREVLREVWEGKIPIRFLSDGVDG----GVSEPFY--LMLFRQSYL
P0CM36|ATG5_CRYNE|8-339  QSTTILFRRLTQSAVTISIRLADGEPGAG--NACDRYY--IKAFRYSYF
Q0UXN8|ATG5_PHANO|4-311  REVTSRLREKVVNGSVPLEIRLHGDCRT--YDSDAYL--IQFPRLSYF
A7KAL6|ATG5_PENCW|4-317  RVLGSIQKAVWDGRLFLEIVLASESRT--FDKTDPLY--ISYFRISYF
ALDMA1|ATG5_NEOF1|10-326  QASLSSIQRAVWDGKLFLEITLASESRT--YDQTDPLY--IACPRISYF
Q3MQ04|ATG5_PIG|1-275  MTDDKDVLRDVFGRIFTCFTLYQDEIT--EREAEFYY--LLEFRVSYL
D6W8J7|D6W8J7_TRICA|1-263  MANDREILREVWEGKLFISFQSDPELV--ELQGPDPFY--LMVPRLSYF
Q12380|ATG5_YEAST|1-287  ---MNDIKQLLWNGELNVLVSI DPSFLMKGSPREIAVLR--IRVPRETYF
Q3MQ21|Q3MQ21_CALSI|1-269  MAEDREILREVWGRVFCVQLASEDCN--TSLAPDPYI--LMVPRLSYF
B7TZ42|B7TZ42_BOMMO|1-264  MANDREVLREIWDGKLFICFHLAQEEIM--EIQQPDPFY--VMVPRLSYF
O74971|ATG5_SCHPO|4-261  DNKNGNIPPELLWNGTISVRIDYEGNS----LAYL--ANVERQSYF
Q59VY1|ATG5_CANAL|4-278  IDNLAEIKKKLWNGSINVKILLN----IEDQIEIYL--LTIFRNSYF
Q99J83|ATG5_MOUSE|1-275  MTDDKDVLRDVFGRIFTCFTLYQDEIT--EREAEFYY--LLEFRVSYL
A3LR68|ATG5_PICST|3-282  DSDIEIKAKLWNGHINLRVLAAYKD----QKVEYL--CTIYRNSYF
Q3MQ09|Q3MQ09 ICTPU|1-275  MADDKDVLRDVFGRIFACFMLYDDEVV--EREAEFYY--LLEFRISYF
A1CE93|ATG5_ASPCL|4-321  QASLNSIQKTVWDGKLFLEITLASESRT--FDQTDPLY--ISCPRISYF
Q7QGY1|Q7QGY1_ANOGA|1-265  MANDREILREIWEKGIPIVHFKLSADET--DVEPEEYF--LLEFRLSYF
C3ZNT2|C3ZNT2_BRAFL|1-261  MADDREVLRELWDGRLPIKFNLADE----LLEFRQSYF
Q0CRF3|ATG5_ASPTN|4-315  QATLNDIQKAVWDGRLFLQITLSPSESRS--YDKTDPLY--ISYFRISYF
Q6CKE2|ATG5_KLULA|1-271  ---MEELRERVWGHGSLNVEIMLSDSIVVPNTPLSEKCYH--IVVLRSEFL
    
```

```

E9H8N6|E9H8N6_DAPPU|1-271  PLVTDKVRRHFEVRCVVFEE-----
Q1DP17|ATG5_COCIM|5-351  PFILPRLFSFSSSLIDFDVQ-----
Q9W3R7|ATG5_DROME|1-269  PLVTDKVRKFFSRYISAHE-----
Q4WNA5|ATG5_ASPFU|10-326  PSLLPRLRAFFSPLSEENSQ-----
A6RE26|ATG5_AJECN|5-333  PFLLPRLRAFFATSLLIDEAQ-----
E2BV18|E2BV18_HARSA|1-265  PLCTEKVKKHFIRHIQSD-----
Q3MQ02|Q3MQ02_XENLA|1-276  TLVTDKVKKHFQKVMRTE-----
Q3MQ23|Q3MQ23_CIOSA|1-266  TLFVTPKIVEHFSRHTEDE-----
Q75BY9|ATG5_ASHGO|1-288  VLHLFPVFNKLRGVLREQE-----
Q3MQ11|Q3MQ11_GASAC|1-275  TLVTDKVKKHFHKKAMRAE-----
Q9FFI2|ATG5_ARATH|1-336  PLLIPLIKPFYFKDSLPPGE-----
C1BTY2|C1BTY2_9MAXI|1-273  PLTLEKVRKHFSSKHTESE-----
E0VWT9|E0VWT9_PEDHC|1-266  PLVTDKIRKQFSRHISTD-----
A7KAI4|ATG5_PICAN|1-275  HNSLPAILLQFFKPFKDAARLAQ-----
Q6BV18|ATG5_DEBHA|4-288  PIYFPFSVITYFQKYNEKIKYMP-----
Q2UBM1|ATG5_ASPOR|4-322  PSLLPRLRAFFASSLIDFSSN-----
Q9H1Y0|ATG5_HUMAN|1-275  TLVTDKVKKHFQKVMRQED-----
C4QII2|C4QII2_SCHMA|163-515  PLVTEKVIKRFQFSQFSEALKTASKDMTSETRGKLEHEMQYAQSDQIDTFK
A5DC23|ATG5_PICGU|1-258  PLYYADISAYFELSQ-----
COHB55|COHB55_SALSA|1-275  TLVTDKVKKHFQKVMRQED-----
Q3MQ08|Q3MQ08_ORYLA|1-275  PLVTDKVKKHFQKVMRTE-----
F1RDC0|F1RDC0_DANRE|2-275  TLVTDKVKKHFQKVMRQED-----
Q17IN4|Q17IN4_AEDAE|1-265  PLVSDKVRKHFRLRFVSN-----
A7SNR5|A7SNR5_NEMVE|1-276  MLVTDKIQRHFQRAVQED-----
A7TS83|ATG5_VANPO|1-290  MNYIDEILNDRKFLITDINFEE-----
C1BN90|C1BN90_9MAXI|1-274  PLALEKVRKHFSSKHLES-----
P0CM36|ATG5_CRYNE|8-339  PLFIPEIRENLVELALDDAQL-----
Q0UXN8|ATG5_PHANO|4-311  ALLIHKLHAFAPSLIYEDIH-----
A7KAL6|ATG5_PENCW|4-317  PSLLPKRLRAFFSNFLIDFNSQ-----
ALDMA1|ATG5_NEOF1|10-326  PSLLPRLRAFFSSSLIEENSQ-----
Q3MQ04|ATG5_PIG|1-275  TLVTDKVKKHFQKVMRQED-----
D6W8J7|D6W8J7_TRICA|1-263  PLVTDKVRKHFRLRYVAND-----
Q12380|ATG5_YEAST|1-287  VNYMPLIWNKIKSFLSDPL-----
Q3MQ21|Q3MQ21_CALSI|1-269  PLVMDKVRKHFRLRLISQE-----
B7TZ42|B7TZ42_BOMMO|1-264  PLVIDKMKRHFRLRFSIQE-----
O74971|ATG5_SCHPO|4-261  AQILPNVQRRLAPSIPI-----
Q59VY1|ATG5_CANAL|4-278  PTVFPQLIRYFQNFITIELS-----
Q99J83|ATG5_MOUSE|1-275  TLVTDKVKKHFQKVMRQED-----
A3LR68|ATG5_PICST|3-282  TLKLPATVEYFSAFVQGLISK-----
Q3MQ09|Q3MQ09 ICTPU|1-275  TLVTDKVKKHFQKVMRQED-----
A1CE93|ATG5_ASPCL|4-321  PSLLPRLRSFFASSLIEEKSQ-----
Q7QGY1|Q7QGY1_ANOGA|1-265  PLVTDKVRKHFRLRFVSN-----
C3ZNT2|C3ZNT2_BRAFL|1-261  PLVADKVRQRYFLKYTANS-----
Q0CRF3|ATG5_ASPTN|4-315  PSLLPRLHAFSSSLIEEFTSK-----
Q6CKE2|ATG5_KLULA|1-271  ALYLPAIVRKLGNNVIVRYEN-----
    
```

E9H8N6|E9H8N6\_DAPPU|1-271 --KHDNEMWLEFERHF-----LKWHPYPIGLLYDLDFVNSE----  
Q1DP17|ATG5\_COCIM|5-351 ---ADGWFSFEGVPE-----LKWHPYPIGLLYDLYAGAEPIITSK  
Q9W3R7|ATG5\_DROME|1-269 ---QDGAWVDFDFNGTPE-----LRLHYPIGVLYDLDLHPEEDS---  
Q4WNA5|ATG5\_ASPFU|10-326 ---PHEGWFSFEGVPE-----LKWHLPIVGLLYDLYAGADPASKG  
A6RE26|ATG5\_AJECN|5-333 ---DYQGWFVFSFEGVPE-----LKWHPYPIGLLYDLYSGADPVTSK  
E2BV18|E2BV18\_HARSA|1-265 -SKQEHHEMWFLEFNGIPE-----LKWHPYPIGVLLDIYFNIDIQ----  
Q3MQ02|Q3MQ02\_XENLA|1-276 ---DISEIWFVFEFEGIPE-----LKWHPYPIGLLFDLHASNTS---  
Q3MQ23|Q3MQ23\_CIOSA|1-266 ---KKSEVWFYEFNGQPE-----LKWQYPIVGLLFDLHCESV---  
Q75BY9|ATG5\_ASHGO|1-288 ---AFHGWVWFGMEDVPE-----VHWNHPVGTLYDLSLVGLRQPERA  
Q3MQ11|Q3MQ11\_GASAC|1-275 ---DVEEMWFVEYEGTPE-----LKWHPYPIGVLLFDLHASV---  
Q9FFI2|ATG5\_ARATH|1-336 ---DSIWFVFDYKGFPE-----LKWYIPIVGLLFDLCAEPE---  
C1BTY2|C1BTY2\_9MAXI|1-273 ---PNADIWFSCNGSPA-----IRWHLPIVGLLFDLSFMMGQET-ED  
E0VWT9|E0VWT9\_PEDHC|1-266 --KQDAEMWLDVFNIGIPE-----LKWHPYPIGVLYDLS-ASDIQ---  
A7KAI4|ATG5\_PICAN|1-275 ---SQKWFVFEFEKVP-----LKWHPYPIVGLLYDLVTDQVQEK-  
Q6BVI8|ATG5\_DEBHA|4-288 ---VWLEYEYETVPE-----IKWHPYPIVGLLYDLDLHLSIIVKNR  
Q2UBM1|ATG5\_ASPOR|4-322 ---ADGWFSFEGVPE-----LKWHLPIGLLYDLYAGADPASKG  
Q9HIY0|ATG5\_HUMAN|1-275 ---ISEIWFVFEYEGTPE-----LKWHPYPIGLLFDLHASSTA---  
C4QII2|C4QII2\_SCHMA|163-515 QHPLVHEFVLEAYHQPE-----LKWHPYPIGLVFDMCANTMD---  
A5DCZ3|ATG5\_PICGU|1-258 ---PLWLEYQGVPE-----LKWNLPIVGLVLSDLLRTPSK---  
COHB55|COHB55\_SALSA|1-275 ---DVEIWFVDFEGTPE-----LKWHPYPIGLLFDLHASNTA---  
Q3MQ08|Q3MQ08\_ORYLA|1-275 ---DVEEMWFVEHEGTPE-----LKWHPYPIVGLLFDLHASNTV---  
F1RDC0|F1RDC0\_DANRE|2-275 ---DVEEMWFVEHEGTPE-----LKWHPYPIVGLLFDLHASNSA---  
Q17IN4|Q17IN4\_AEDAE|1-265 ---LDGEMWVMDSNGTPE-----LKWHPYPIVGLLFDLVLGGDAI---  
A7SNR5|A7SNR5\_NEMVE|1-276 ---SVEVWFVFEYDQGP-----LKWHPYPIVGLLFDLHGSSTA---  
A7TS83|ATG5\_VANPO|1-290 ---LDGMWFVFAVEGIP-----LYWNPYPIVGLYDSMVGIDPSIRY  
C1BN90|C1BN90\_9MAXI|1-274 ---SDSELWFSCNGSPA-----LRWHLPIVGLLFDLFIQSQESPEE  
P0CM36|ATG5\_CRYNE|8-339 --QIDKKNWFVEEVESEEDKQRFVVRGGA-----CRWHWPIDLDVHISFISRPPLP  
Q0UXN8|ATG5\_PHANO|4-311 ---PSDLWFVFSYEGVPE-----LKWHPYPIVGLLYDLYSGAEFYHPS  
A7KAL6|ATG5\_PENCW|4-317 ---SDGWVFEFEGVPE-----LKWHPYPIVGLLFDLYAGVDPASKT  
A1DMA1|ATG5\_NEOFI|10-326 ---PHEGWFSFEGVPE-----LKWHLPIVGLLYDLYAGADPASKG  
Q3MQ04|ATG5\_PIG|1-275 ---ISEIWFVFEYEGTPE-----LKWHPYPIVGLLFDLHASSTA---  
D6W8J7|D6W8J7\_TRICA|1-263 --KQDREMWFLEVDGQPE-----MKWHPYPIVGLLYDLDLITSDQ---  
Q12380|ATG5\_YEAST|1-287 -TDSKEYFWFEHNKTP-----IPWNPYPIVGLLFDCLA-GKSAFTFT  
Q3MQ21|Q3MQ21\_CALSI|1-269 --LQEAEMWFLESDGMP-----LKWHPYPIVGLLFDLHCGGAS---  
B7TZ42|B7TZ42\_BOMMO|1-264 ---NSDEMWFVDFNGQPE-----LKWHPYPIVGLLYDLYCGNDQ---  
O74971|ATG5\_SCHPO|4-261 ---LSECVLDYNGVPE-----LKWHPYPIVGLLFDLTLVDFDTPR  
Q59VY1|ATG5\_CANAL|4-278 ---KVPWFVLEFEEVPE-----LKWHPYPIVGLLYDLYLFPALLNDH  
Q99J83|ATG5\_MOUSE|1-275 ---VSEIWFVFEYEGTPE-----LKWHPYPIVGLLFDLHASSTA---  
A3LR68|ATG5\_PICST|3-282 ---QLWVFEYEGVPE-----IKWNLPIVGLLYDLYLHLPVSLGNF  
Q3MQ09|Q3MQ09 ICTPU|1-275 ---DVEEMWFVEYEGTPE-----LKWHPYPIVGLLFDLHASNTA---  
A1CE93|ATG5\_ASPCL|4-321 ---PHEGWFSFEGVPE-----LKWHLPIVGLLYDLYAGADPASKG  
Q7QGY1|Q7QGY1\_ANOGA|1-265 --LDGEMWVMDSNGTPE-----LKWHPYPIVGLLYDLDLVLGTDGT---  
C3ZNT2|C3ZNT2\_BRAFL|1-261 ---QVEEMWFLEVEGQPE-----LKWHPYPIVGLLFDLHASSTM---  
Q0CRF3|ATG5\_ASPFN|4-315 ---PHDGVWVFSFEGVPE-----LKWHLPIVGLLYDLYAGADPASKG  
Q6CKE2|ATG5\_KLULA|1-271 ---PYKQWVFEYDGVPE-----VPWEYPIVGLLFDLFLCNSSTTSTG

E9H8N6|E9H8N6\_DAPPU|1-271 -----LPWQIT  
Q1DP17|ATG5\_COCIM|5-351 SLSSPSPSREHYVRGGTRENISESGAEGEKDDNHGHDHEFKRDALPWRLM  
Q9W3R7|ATG5\_DROME|1-269 -----TPWCLT  
Q4WNA5|ATG5\_ASPFU|10-326 TRVDETDHPTS-SL-----NDLTPWRLT  
A6RE26|ATG5\_AJECN|5-333 STVGEHLSHTTSPRPQNDPEPHN-----VHEPGDPIPWQLQ  
E2BV18|E2BV18\_HARSA|1-265 -----LPWNIIV  
Q3MQ02|Q3MQ02\_XENLA|1-276 -----LPWSII  
Q3MQ23|Q3MQ23\_CIOSA|1-266 -----LPWVIT  
Q75BY9|ATG5\_ASHGO|1-288 AQFQAN-----TLTMWTLT  
Q3MQ11|Q3MQ11\_GASAC|1-275 -----LPWSIT  
Q9FFI2|ATG5\_ARATH|1-336 -----RPWNLT  
C1BTY2|C1BTY2\_9MAXI|1-273 NDASFH-----LPWNLN  
E0VWT9|E0VWT9\_PEDHC|1-266 -----LPWNIT  
A7KAI4|ATG5\_PICAN|1-275 -----QMWEIT  
Q6BVI8|ATG5\_DEBHA|4-288 ED-----SSTLT  
Q2UBM1|ATG5\_ASPOR|4-322 TABESDAGWDIDDQ-----DNPPLPWRLV  
Q9HIY0|ATG5\_HUMAN|1-275 -----LPWNIT  
C4QII2|C4QII2\_SCHMA|163-515 -----IPWKIT  
A5DCZ3|ATG5\_PICGU|1-258 -----EAWEVQ  
COHB55|COHB55\_SALSA|1-275 -----LPWSIT  
Q3MQ08|Q3MQ08\_ORYLA|1-275 -----LPWSIT  
F1RDC0|F1RDC0\_DANRE|2-275 -----LPWNIT  
Q17IN4|Q17IN4\_AEDAE|1-265 -----LPWPIT  
A7SNR5|A7SNR5\_NEMVE|1-276 -----LPWNLT  
A7TS83|ATG5\_VANPO|1-290 DQMKQCN-----SMNNIWKLQ  
C1BN90|C1BN90\_9MAXI|1-274 SDPSLH-----LPWNLQ  
P0CM36|ATG5\_CRYNE|8-339 SSIELSS-----TPRVISL  
Q0UXN8|ATG5\_PHANO|4-311 DSPPPSPPTPSKQDS-----KQPLPWRLT  
A7KAL6|ATG5\_PENCW|4-317 AARDNESP-----GSSLPWRLI  
A1DMA1|ATG5\_NEOFI|10-326 TRIDETHPSS-SL-----SDTLPWRLT  
Q3MQ04|ATG5\_PIG|1-275 -----LPWNIT  
D6W8J7|D6W8J7\_TRICA|1-263 -----LPWNIT  
Q12380|ATG5\_YEAST|1-287 TSFENQVK-----DVLTLFRIH  
Q3MQ21|Q3MQ21\_CALSI|1-269 -----LPWALT  
B7TZ42|B7TZ42\_BOMMO|1-264 -----PWTTLT  
O74971|ATG5\_SCHPO|4-261 AP-----VLWRIQ  
Q59VY1|ATG5\_CANAL|4-278 DLG-----CWTIS  
Q99J83|ATG5\_MOUSE|1-275 -----LPWNIT  
A3LR68|ATG5\_PICST|3-282 ES-----SSWTVY  
Q3MQ09|Q3MQ09 ICTPU|1-275 -----LPWSIT  
A1CE93|ATG5\_ASPCL|4-321 SRPDESEQIIS-SV-----GDTLPWRLT  
Q7QGY1|Q7QGY1\_ANOGA|1-265 -----LPWHTV  
C3ZNT2|C3ZNT2\_BRAFL|1-261 -----LPWSLV  
Q0CRF3|ATG5\_ASPFN|4-315 SGPASDDE--TA-----EFLPWRLV  
Q6CKE2|ATG5\_KLULA|1-271 KEDDQR-----LQMWKLK

E9H8N6|E9H8N6\_DAPPU|1-271  
Q1DP17|ATG5\_COCIM|5-351  
Q9W3R7|ATG5\_DROME|1-269  
Q4WNA5|ATG5\_ASPFU|10-326  
A6RE26|ATG5\_AJECN|5-333  
E2BV18|E2BV18\_HARSA|1-265  
Q3MQ02|Q3MQ02\_XENLA|1-276  
Q3MQ23|Q3MQ23\_CIOSA|1-266  
Q75BY9|ATG5\_ASHGO|1-288  
Q3MQ11|Q3MQ11\_GASAC|1-275  
Q9FFI2|ATG5\_ARATH|1-336  
C1BTY2|C1BTY2\_9MAXI|1-273  
E0VWT9|E0VWT9\_PEDHC|1-266  
A7KAI4|ATG5\_PICAN|1-275  
Q6BVI8|ATG5\_DEBHA|4-288  
Q2UBM1|ATG5\_ASPOR|4-322  
Q9HIY0|ATG5\_HUMAN|1-275  
C4QII2|C4QII2\_SCHMA|163-515  
A5DCZ3|ATG5\_PICGU|1-258  
COHB55|COHB55\_SALSA|1-275  
Q3MQ08|Q3MQ08\_ORYLA|1-275  
F1RDC0|F1RDC0\_DANRE|2-275  
Q17IN4|Q17IN4\_AEDAE|1-265  
A7SNR5|A7SNR5\_NEMVE|1-276  
A7TS83|ATG5\_VANPO|1-290  
C1BN90|C1BN90\_9MAXI|1-274  
P0CM36|ATG5\_CRYNE|8-339  
Q0UXN8|ATG5\_PHANO|4-311  
A7KAL6|ATG5\_PENCW|4-317  
A1DMA1|ATG5\_NEOFI|10-326  
Q3MQ04|ATG5\_PIG|1-275  
D6W8J7|D6W8J7\_TRICA|1-263  
Q12380|ATG5\_YEAST|1-287  
Q3MQ21|Q3MQ21\_CALSI|1-269  
B7TZ42|B7TZ42\_BOMMO|1-264  
O74971|ATG5\_SCHPO|4-261  
Q59VY1|ATG5\_CANAL|4-278  
Q99J83|ATG5\_MOUSE|1-275  
A3LR68|ATG5\_PICST|3-282  
Q3MQ09|Q3MQ09 ICTPU|1-275  
A1CE93|ATG5\_ASPCL|4-321  
Q7QGY1|Q7QGY1\_ANOGA|1-265  
C3ZNT2|C3ZNT2\_BRAFL|1-261  
Q0CRF3|ATG5\_ASPFN|4-315  
Q6CKE2|ATG5\_KLULA|1-271

VHFDK-YFDNKLILKCP-SKDV-----VESHLMHSLKEADALKH-KN  
VHFHD-WPEQDLIRLDPEGKI-----LHDAFINSVKEADCLRNGTA  
IHFSK-FEEDMLVKLN-SKEL-----LESHYMSCLEADVLKH-RG  
Q4WNA5-WEDEELVRLDADGMV-----MHDAFINSVKEADFLRNGTA  
VHFSD-WFDQELVRLDADGRV-----IHDAFINSVKEADFVRNGTA  
VHFDK-FFENVLMHCQ-NKEV-----VEAHFSLCIKEADVLKH-RG  
VHFKN-FPAKDLLRCQ-SKDV-----IEAHFMSVKEADALKH-KS  
VHFHN-FFTGEILIRCS-SEKA-----IESNYLSMLKEADQLKH-KG  
LNYSE-DPRDGSVPLVRGMQQ-----VGGFWRHQWKQACYIHHGSS  
VHFKN-FEDRDLHLCP-SSV-----IEAHFMSGIKEADALKH-KS  
IHFRG-YPCNLIIPCE-GEDS-----VKWNFVNSLKEAQYIINGNC  
VVFGE-FFSEEIIRFN-SRES-----LETYFMSCLKEADQIKH-GG  
VHFSK-FEKEIMHCY-SKEV-----VESYFMSCIKEADVLKH-RS  
LKYD-YBIEYVIPIDQNSF-----LKDHWNLQLKEACFILNGSS  
LRFSDDYFTDQVIPFTYTDVDN-SVNYNKSLEKVVNQLKQSCFVINGNS  
VHFSD-WFDEELVRLDADGMV-----MHDAFINSVKEADFLRNGTA  
VHFKS-FEEDLHLCP-SKDA-----IEAHFMSCKEADALKH-KS  
VHFSN-YTDDLRLSPVRLA-----VETHFLSMKEADALKH-RS  
LRTDN-LPSHEIIPYHYVEDN-SIDYTRALREVVINHIKQSCYTLNGNA  
VHFKN-FEERDLHLCP-SNSV-----IEAHFMSIKEADALKH-KS  
VHFKN-FEDVLLHCP-TNSM-----VEAHFMSIKEADALKH-KS  
VHFKN-FEQDLLHCS-TNSV-----IEAHFMSCIKEADALKH-KG  
VHFSK-FEEDVLFRC-PNKDI-----VEAHFMSGLKEADVLKH-RG  
VHFQK-FETDELMLRCP-GKEA-----VEAHFMSVKEADSLKH-RS  
LNYSK-EXYPSGMIPIVDRVNQ-----IQKYWMHQWKQACFVINGTS  
VMSGD-FFTEEIRLN-SKES-----LETYFSLCCKEADQIKH-GG  
LHLSN-FEQDRLLMPS-IEV-----CKSQWNLQVKEADFVRWRNT  
LHTSA-YTTQLIPLDNNLQ-----IHDLFHSHVKEADYLRTGTG  
VHFSD-WFDDLVRLDAYGMV-----MHDAFINSVKEADFLRNGTA  
VHFSD-WFDEELVRLDADGMV-----MHDAFINSVKEADFLRNGTA  
VHFKS-FEEDLHLCP-SKDV-----IEAHFMSVKEADALKH-KS  
VHFDK-FFENQIYKFS-NKET-----VESYFMACLKEADVLKH-RG  
LVMGD-SLPTIIPASSKTQ-----AEKFWFHQWKQVCFILNGSS  
AHFSH-FEEDLIRCP-TREV-----VESHFMSVKEADGLKH-RG  
VHFTK-FFEDLILHCP-NKDV-----VEAHYMSVKEADVLKH-RG  
LRSGL-FFTTKILQMET-MDT-----FRTYFFNCLKESYVRNGSS  
MKYEPVYBIEYIISFNKLAGDGGQIDYMKTMNRILMNLKQSCFVINGTA  
VHFKS-FPEKDLLHCP-SKDA-----VEAHFMSCKEADALKH-KS  
LRYDD-YFSDYIIPFIYKDDG-TVDFDRSLKEVIVNQLKQSCFVINGNS  
VHFKH-FEDRDLRCS-SSV-----IEAHFMSVKEADAFKH-KS  
LHFSW-WEDEELVRLDADGMV-----MHDAFINSVKEADFLRNGTA  
VHFSK-FDDLILRCP-NKEI-----VEAHFMSVKEADVLKH-RG  
VHFQK-FEEDLHCP-GKDA-----VESHFMSVKEADTLKH-RG  
VQFSD-WEDEELVRLDADGMV-----MHDAFINSVKEADFMRNGTA  
LCHGN-KYPPGILPLVDGLRQ-----VKDHWKHQWKQACFILNGSA

E9H8N6|E9H8N6\_DAPPU|1-271  
Q1DP17|ATG5\_COCIM|5-351  
Q9W3R7|ATG5\_DROME|1-269  
Q4WNA5|ATG5\_ASPFU|10-326  
A6RE26|ATG5\_AJECN|5-333  
E2BV18|E2BV18\_HARSA|1-265  
Q3MQ02|Q3MQ02\_XENLA|1-276  
Q3MQ23|Q3MQ23\_CIOSA|1-266  
Q75BY9|ATG5\_ASHGO|1-288  
Q3MQ11|Q3MQ11\_GASAC|1-275  
Q9FFI2|ATG5\_ARATH|1-336  
C1BTY2|C1BTY2\_9MAXI|1-273  
E0VWT9|E0VWT9\_PEDHC|1-266  
A7KAI4|ATG5\_PICAN|1-275  
Q6BVI8|ATG5\_DEBHA|4-288  
Q2UBM1|ATG5\_ASPOR|4-322  
Q9HIY0|ATG5\_HUMAN|1-275  
C4QII2|C4QII2\_SCHMA|163-515  
A5DCZ3|ATG5\_PICGU|1-258  
COHB55|COHB55\_SALSA|1-275  
Q3MQ08|Q3MQ08\_ORYLA|1-275  
F1RDC0|F1RDC0\_DANRE|2-275  
Q17IN4|Q17IN4\_AEDAE|1-265  
A7SNR5|A7SNR5\_NEMVE|1-276  
A7TS83|ATG5\_VANPO|1-290  
C1BN90|C1BN90\_9MAXI|1-274  
P0CM36|ATG5\_CRYNE|8-339  
Q0UXN8|ATG5\_PHANO|4-311  
A7KAL6|ATG5\_PENCW|4-317  
A1DMA1|ATG5\_NEOFI|10-326  
Q3MQ04|ATG5\_PIG|1-275  
D6W8J7|D6W8J7\_TRICA|1-263  
Q12380|ATG5\_YEAST|1-287  
Q3MQ21|Q3MQ21\_CALSI|1-269  
B7TZ42|B7TZ42\_BOMMO|1-264  
O74971|ATG5\_SCHPO|4-261  
Q59VY1|ATG5\_CANAL|4-278  
Q99J83|ATG5\_MOUSE|1-275  
A3LR68|ATG5\_PICST|3-282  
Q3MQ09|Q3MQ09 ICTPU|1-275  
A1CE93|ATG5\_ASPCL|4-321  
Q7QGY1|Q7QGY1\_ANOGA|1-265  
C3ZNT2|C3ZNT2\_BRAFL|1-261  
Q0CRF3|ATG5\_ASPFN|4-315  
Q6CKE2|ATG5\_KLULA|1-271

HIMALMCEERDHKQLWLGLLHDFRDFWFSANRKLMEHSA-----  
KRIMALSKEDSSGLWKSVEEHNLPAYHRIHNTLLLPFP-----  
LVISAMQKCDHNQLWLGLVNEKLFDFWAVNRRLMEFYG-----  
KGIIMTSLKEDSAGLWQAVQDVKLDFQRISNILLPPP-----  
KRIMTSLKEDSSGLWQAVQEHDFTFQRISNILLPPG-----  
QIVSSMQKCDHNQLWLGLVNEKLFDFWAVNRRLMEAIT-----  
QVINEMQKCDHNQLWLGLVNEKLFDFWAVNRRLMEFSP-----  
QIINNMRTEQQGQLWGVKMDNFEFWSINKQFMTDYE-----  
KQIMSLSIPDSKTFWDVLCVLRDQVRFVRSIRITAR-----  
HVVDNMQKCDHNQLWLGLVNEKLFDFWAVNRRLMEYSS-----  
KNVMNMSQSDQEDLWTSVMNGDLDAYTRLSPKLKMGTVEDEFS-----  
RVLSKMQKCDHNQLWLGLVNEKLFDFWAVNRRLMEIEGTGE-----  
QVVSNMQKCDHNQLWLGLVNEKLFDFWAVNRRLMEVSG-----  
KLVNMSRTDSDDFYHAAIHKSDTFESMFRKLLPSS-----  
KPIIMNLSKEDSDELWNSIRIHNLKSFQSNIKKIPIQ-----  
KQVMSLSLVHSQQFVKSILMRDYITFYKIALKIIPS-----  
RVLSKMQKCDHNQLWLGLVNEKLFDFWAVNRRLMEAGSSSE-----  
NRVTNLRVLDLEAGWDGIVNNDFDLYAQMVNKIVPLPLTSSNSTQPSR-----  
KTVMFLSQADSTQLWDVAVKHDFALFNPNIKLLNPQ-----  
KGIIMTSLKEDSAGLWQAVQDVKLDFQRISNILLPPP-----  
RVIDSMQKCDHNQLWLGLVNEKLFDFWAVNRRLMEIYPP-----  
QIASNMQKCDHNQLWLGLVNEKLFDFWAVNRRLMEVSO-----  
KAIMSLSVNEARKFVGSVITRNFQDFIEISNKISS-----  
QIITNMSKCDHNQLWLGLVNEKLFDFWAVNRRLMESTP-----  
QVMSMQKCDHNQLWLGLVNEKLFDFWAVNRRLMESHG-----  
SGIIALSKAETDTYWNAIINHDDYDFRPIAKILFSK-----  
KPIIMQLEANTNQLWKSLSIRNLGDFVAVNRRLMEYPP-----  
QVINEMQKCDHNQLWLGLVNEKLFDFWAVNRRLMEYPP-----  
KPIIMSLSEANSIQLWVSIVDHNLSAVTSINKKIVPKD-----  
QVINDMQKCDHNQLWLGLVNEKLFDFWAVNRRLMEYPT-----  
KGIIMSLKEDSSGLWQAVQDVKLDFQRISNILLPPP-----  
QVVSAMQKCDHNQLWLGLVNEKLFDFWAVNRRLMEYPP-----  
QVINGMQKCDHNQLWLGLVNEKLFDFWAVNRRLMEYPP-----  
KGIIMTSLKEDSSGLWKSVDVDFLPSFQRISNILLPPP-----  
KRIMSLSIPDFEAFWQSLISRHQDXYIKVREKLLTPE-----

E9H8N6|E9H8N6\_DAPPU|1-271 -----EDGFRYI PFRLY V PQL-----  
Q1DP17|ATG5\_COCIM|5-351 -----PTPFRNIP RIRIFLPAPPDPS PSLKVIQS  
Q9W3R7|ATG5\_DROME|1-269 -----DLESFKNIP LRIYFD-----  
Q4WNA5|ATG5\_ASPFU|10-326 -----NQPFNRVPI RFFFLSPDPSGSPSLKVVQS  
A6RE26|ATG5\_AJECN|5-333 -----PNHFRNIP LRIFFLPSPNSATPSLKVIQS  
E2BV18|E2BV18\_HARSA|1-265 -----EEGFKYI PFRCYFS-----  
Q3MQ02|Q3MQ02\_XENLA|1-276 -----EDGGFRYI PFRIYQT-----  
Q3MQ23|Q3MQ23\_CIOSA|1-266 -----HSECFRCI PIRIYFQ-----  
Q75BY9|ATG5\_ASHGO|1-288 -----KGGVKALP VRIHQTT-----  
Q3MQ11|Q3MQ11\_GASAC|1-275 -----EDGGFRYI PFRIYQT-----  
Q9FFI2|ATG5\_ARATH|1-336 RKTSLSSP QSQVVPE TEVAG QVKTARI PVRLY VRSLNKDFENLEDVPEI  
C1BTY2|C1BTY2\_9MAXI|1-273 -----NEIGGFRHI PVRIYKG-----  
E0VWT9|E0VWT9\_PEDHC|1-266 -----DENFKYI PFRCYFS-----  
A7KAI4|ATG5\_PICAN|1-275 -----VSSLKNLPI KVIYLP-----  
Q6BVI8|ATG5\_DEBHA|4-288 -----KKFQKLP VKIYLP-----  
Q2UBM1|ATG5\_ASPOR|4-322 -----QPFNRNIP RIRIFLPAPPDPS PSLKVIQS  
Q9HIY0|ATG5\_HUMAN|1-275 -----ENGFRIYI PFRIYQT-----  
C4QI12|C4QI12\_SCHMA|163-515 ASEIPENKPLSSSLDNISSSK CRTFRYI PFRLYCV-----  
A5DCZ3|ATG5\_PICGU|1-258 -----IHRIPVKVIYLSG-----  
COHB55|COHB55\_SALSA|1-275 -----EGGFRYI PFRIYLT-----  
Q3MQ08|Q3MQ08\_ORYLA|1-275 -----EGGFRYI PFRIYQT-----  
F1RDC0|F1RDC0\_DANRE|2-275 -----EGGFRYI PFRIYQT-----  
Q17IN4|Q17IN4\_AEDAE|1-265 -----DQDGFKHI PVRCYAE-----  
A7SNR5|A7SNR5\_NEMVE|1-276 -----D DPFYKI PFRKIYLV-----  
A7TS83|ATG5\_VANPO|1-290 -----KPRHI PMLMIHLT-----  
C1BN90|C1BN90\_9MAXI|1-274 -----DEASSFKHI PVRIYKG-----  
P0CM36|ATG5\_CRYNE|8-339 -----PSSADPSGPPRAPDSYATRAIP FKIYLPDN-----  
Q0UXN8|ATG5\_PHANO|4-311 -----GVNLRHLP VRLYLP HAVGVEEDR-----  
A7KAL6|ATG5\_PENCW|4-317 -----SQPFNRVPI RIVFLP LLPDAESSLSKVVQT  
A1DMA1|ATG5\_NEOFI|10-326 -----NQPFNRNIP RFFFLSPDPSGSPSLKVVQS  
Q3MQ04|ATG5\_PIG|1-275 -----ENGFRIYI PFRIYQT-----  
D6W8J7|D6W8J7\_TRICA|1-263 -----QEHFYKI PFKCYLD-----  
Q12380|ATG5\_YEAST|1-287 -----RFRHIPLI IQTSR-----  
Q3MQ21|Q3MQ21\_CALSI|1-269 -----EEGFKFI PFRLHCP-----  
B7TZ42|B7TZ42\_BOMMO|1-264 -----DNDGFKHI PFRIYLD-----  
O74971|ATG5\_SCHPO|4-261 -----SKFIPLKIYLG-----  
Q59VY1|ATG5\_CANAL|4-278 -----TIDRI PVKIYTAG-----  
Q99J83|ATG5\_MOUSE|1-275 -----ENGFRIYI PFRIYQT-----  
A3LR68|ATG5\_PICST|3-282 -----KAQKIP VRIYLP-----  
Q3MQ09|Q3MQ09 ICTPU|1-275 -----EGGFRYI PFRIYQT-----  
A1CE93|ATG5\_ASPCL|4-321 -----NQPFNRVPI RFFFLP LLPDPSGSPSLKVVQS  
Q7QGY1|Q7QGY1\_ANOGA|1-265 -----DQDGFKHI PVRCYAE-----  
C3ZNT2|C3ZNT2\_BRAFL|1-261 -----ENCFKHL PFRLYQA-----  
Q0CRF3|ATG5\_ASPFN|4-315 -----NQPFNRVPI RFFFLP LLPDPSGAPSLKVVQS  
Q6CKE2|ATG5\_KLULA|1-271 -----NKTKHIPI RVWLT-----

E9H8N6|E9H8N6\_DAPPU|1-271 -----TSKPFVY LIKPVENEKK--LVVEDLLQRANLNF-----  
Q1DP17|ATG5\_COCIM|5-351 PIPPLIQTASPFSSS ISSASRQMQP-QVQTIGTALNSLPSLFFS-----  
Q9W3R7|ATG5\_DROME|1-269 -----DDFTYTOK LISPI SVGG-QKKS LADLMAELSTP VRRRA-----  
Q4WNA5|ATG5\_ASPFU|10-326 PLPPNIPA-TTNTSOSTNLRHSPAT-QVQT LGSALHSLLPNLFPS-----  
A6RE26|ATG5\_AJECN|5-333 LFPP--TIPPAANO TGAPGRQTQP-QPQTIGSSLSLPSLFFS-----  
E2BV18|E2BV18\_HARSA|1-265 -----EDKYIOK LVRPINEEG-QRKT LKHLLESEV-FPD-----  
Q3MQ02|Q3MQ02\_XENLA|1-276 -----INDRFFIOK LFRPVANDG-RPHT LGDLIREICPAAVFTE-----  
Q3MQ23|Q3MQ23\_CIOSA|1-266 -----NQIIOK LFKPSENT--QLTLKEALTMCLPMLFQDDE-----  
Q75BY9|ATG5\_ASHGO|1-288 -----LRELRTLQPTVKPGEWGG--TLGELLRAELPECFKN-----  
Q3MQ11|Q3MQ11\_GASAC|1-275 -----TSDRFFIOK LFRPTSPEG-SAHT LGDILLKEMCP TALFPD-----  
Q9FFI2|ATG5\_ARATH|1-336 DTWDDI--SYLNRPFV LKEEG-KCFTLRDAIKSLPEFMGDRAQTS  
C1BTY2|C1BTY2\_9MAXI|1-273 -----DGPMIOK I VNTLEDKSKATIKDMLLEFLPDC-----  
E0VWT9|E0VWT9\_PEDHC|1-266 -----DYYIOK LIRPITEEG-QKKILQNLIDEV-FLR-----  
A7KAI4|ATG5\_PICAN|1-275 -----LSNKLIOP VLSNL--G-RKVT LGNLLQDLIPDLFFS-----  
Q6BVI8|ATG5\_DEBHA|4-288 -----GSATIIHAPIYPSDSG-EAVLLRDLIEEYLPDLMS-----  
Q2UBM1|ATG5\_ASPOR|4-322 PVPPLIPFSSVAASO LALSRS SITP-QTQTIGSALHSLLPNLFPS-----  
Q9HIY0|ATG5\_HUMAN|1-275 -----TERPFIOK LFRPVAADG-QLHT LGDILLKEVCP SAKIDP-----  
C4QI12|C4QI12\_SCHMA|163-515 --SENPSSTP SGFIOK LIRPLNDDGSLSTLQDAIEILFHTNKN-----  
A5DCZ3|ATG5\_PICGU|1-258 -----TSTVNF FAVDHS HQKPTTLRKKV LGDITPALLDEN-----  
COHB55|COHB55\_SALSA|1-275 -----MSDRFFIOK LFRPISP DG-HHTL LGDILLKEVY PVAISND-----  
Q3MQ08|Q3MQ08\_ORYLA|1-275 -----NDRPFIOR LFRPVSTEG-NPHTLFDLLKEMCPDALT KD-----  
F1RDC0|F1RDC0\_DANRE|2-275 -----MSDRFFIOT LFRPVSSG-QALTLGDLLKELFPAATE-----  
Q17IN4|Q17IN4\_AEDAE|1-265 -----DGSYQOK L VAPSTETG-QKRTLQD LLEDF-STP-----  
A7SNR5|A7SNR5\_NEMVE|1-276 -----DKPFIOW LFRPVSDTG-EQTLRDL LQLCVPHVLSANS-----  
A7TS83|ATG5\_VANPO|1-290 FEI QIIOPICKFEDDSG-NPQTLKDMMLTELPDIFS-----  
C1BN90|C1BN90\_9MAXI|1-274 -----DAPMCKLIKTKTEDKSLATLTKDMILEFYFES-----  
P0CM36|ATG5\_CRYNE|8-339 -----APVIOEIVPPISESG-KPTLLAVLQVHLPLLFPISSENP-----  
Q0UXN8|ATG5\_PHANO|4-311 -----GMSVRRVVO SLVKVEVGSR-QPQTIGTALNQILPTLFFS-----  
A7KAL6|ATG5\_PENCW|4-317 PLPPSIPASSMQSSO I LTRS GSTL-QPQTIGTVLHTLPLNLFPS-----  
A1DMA1|ATG5\_NEOFI|10-326 PLPPSIPV-A TNTSOSTNLRNSPAT-QVQT LGSALHSLLPNLFPS-----  
Q3MQ04|ATG5\_PIG|1-275 -----TERPFIOK LFRPVAADG-QLHT LGDILLREVCP SAVAP-----  
D6W8J7|D6W8J7\_TRICA|1-263 -----DGYRQOK LKIPVEDG-QRKT LQDLINEM-FPS-----  
Q12380|ATG5\_YEAST|1-287 -----TSGTFRISOPT ISMTGVNPTLKDIEGDIL DVKEG-----  
Q3MQ21|Q3MQ21\_CALSI|1-269 -----FQAPIOR LIRPLTE DG-RVTLADLLMEY-LSV-----  
B7TZ42|B7TZ42\_BOMMO|1-264 -----DGVNORLVC PKNTDN-SRKT LQQMISEL--YF-----  
O74971|ATG5\_SCHPO|4-261 -----ANAPIIO T S APLG-----SSLGEFLNKR LPLD LFFS-----  
Q59VY1|ATG5\_CANAL|4-278 -----SPIVVOAPI SKD-----QTLQEI LSLHTPNLSS-----  
Q99J83|ATG5\_MOUSE|1-275 -----TERPFIOK LFRPVAADG-QLHT LGDILLREVCP SAVAP-----  
A3LR68|ATG5\_PICST|3-282 -----GTTTIVOAPIYYPG-EE-EPTSMR DVLSLHLP LFAFER-----  
Q3MQ09|Q3MQ09 ICTPU|1-275 -----LSDRFFIOK PFRPVSSG-HAHT LGDILLKEMCPA VAVCQD-----  
A1CE93|ATG5\_ASPCL|4-321 PLPPSIPASTANATO STVLRGKPA-SLQ TIGSALHSLLPNLFPS-----  
Q7QGY1|Q7QGY1\_ANOGA|1-265 -----DGTYQOK L VAPSTASG-QKRL LQD LLDLDF-STP-----  
C3ZNT2|C3ZNT2\_BRAFL|1-261 -----DKPCIOR LFRPITEEG-EQRLLGD LVRVAPQVFNTE-----  
Q0CRF3|ATG5\_ASPFN|4-315 PLPPTLPFSSMAASO AAI SR--TP-QPQT LGTALHALP NLFPS-----  
Q6CKE2|ATG5\_KLULA|1-271 -----ADASFLQPSI PANS--DTMTLFDVMTSM DIKLEEN-----



```

E9H8N6|E9H8N6_DAPPU|1-271  -----E S K G F F Q V V I H G I D I P L E T P L Q W I S E H L S Y P D N F
Q1DP17|ATG5_COCIM|5-351  -----R T P M L A K P V L H G A V V P M S A P V E E V V K C A G Y A D G W
Q9W3R7|ATG5_DROME|1-269  -----G - - - - V G C R T H G I D L H E T Q L Q W M S E H L S Y P D N F
Q4WNA5|ATG5_ASPFU|10-326  -----R T P V L A K P V L H G A A V P M S A P I E E L V R S C A Y G D G W
A6RE26|ATG5_AJECN|5-333  -----R I P V L A K P V L Q G A V V P M T A P L E E V V R V A G Y A D G W
E2BV18|E2BV18_HARSA|1-265  -----Q - E S V T V R T H G I I P P L E T P L Q W M A E H L S Y P D N F
Q3MQ02|Q3MQ02_XENLA|1-276  -----D E E K K Y Q V M I H G I E P M L E T P V Q W L S E H L S Y P D N F
Q3MQ23|Q3MQ23_CIOSA|1-266  -----T - - T T P Q V I T Q G V H P P L Q A P L Q W L S E N F G Y A D N F
Q75BY9|ATG5_ASHGO|1-288  -----G S V L R P V V H G I E V S P E S Q L A D L Y H L F C S F D G F
Q3MQ11|Q3MQ11_GASAC|1-275  -----G E P K R Y Q V V I H G I E P L L E T P L Q W L S E H L S Y P D N F
Q9FFI2|ATG5_ARATH|1-336  G E E R S I D D T E E A D G S R E M G E I K L V R I Q G I E M K L E I P F S W V V N L M N P E F Y
C1BTY2|C1BTY2_9MAXI|1-273  -----D V D N L Q F L T Q G I S P P L D T P I Q W L S K H L S Y P D N F
E0VWT9|E0VWT9_PEDHC|1-266  -----N S E K V K V F T H G I E P P R D T P L Q W M S E H L S Y P D N F
A7KAI4|ATG5_PICAN|1-275  -----S L M Y T V A H P Y S H G V V L P L D S S I D L Y I C M K S L D G F
Q6BVI8|ATG5_DEBHA|4-288  -----N N E T L G S I Y I H G I N V E T I I N K D I I D V W E L F K H L D
Q2UBM1|ATG5_ASPOR|4-322  -----R T P V L A K P V L H G A A V P M S A P V E E L V R S S A Y G D G W
Q9HIY0|ATG5_HUMAN|1-275  -----D G E K K N Q V M I H G I E P M L E T P L Q W L S E H L S Y P D N F
C4QII2|C4QII2_SCHMA|163-515  -----P L V Q M T E P K G Y L F F H G I T L P H E T P M Q W I S E H L S Y P D N F
A5DCZ3|ATG5_PICGU|1-258  -----L - - L A T T V L I H G V D C N S L I D E P I L D V W R T F R Y L D
COHB55|COHB55_SALSA|1-275  -----D E S K R Y Q V V I H G I E P L L E T P L Q W L S E H L S Y P D N F
Q3MQ08|Q3MQ08_ORYLA|1-275  -----G E E K R F Q V V I H G I E P L L E T P L Q W L S E H L S Y P D N F
F1RDC0|F1RDC0_DANRE|2-275  -----D E P K K F Q V M I H G I E P L L E T P I Q W L S E H L S Y P D N F
Q17IN4|Q17IN4_AEDAE|1-265  -----V R K A V E A R T H G V T I P S T T P L Q W L S E H L S Y P D N F
A7SNR5|A7SNR5_NEMVE|1-276  -----M D V S Q W R I V I Q G I E P P L D S T P T Q W L S E H L S Y P D N F
A7TS83|ATG5_VANPO|1-290  -----V D E T P I A K V V S H G I E I P F D M P L F A L Y E R F L S C D A F
C1BN90|C1BN90_9MAXI|1-274  -----N T D D M Q V L T Q G I S P H M D T P L Q W L S E H L S Y P D N F
P0CM36|ATG5_CRYNE|8-339  -----Y E L A F P I A Q G I L I P Q E A E V A W I A S C L C G V D G W
Q0UXN8|ATG5_PHANO|4-311  -----R S A L L A Q A V L H G A V V P L G A S V E E L I R S V A Y L D G W
A7KAL6|ATG5_PENCW|4-317  -----R T P V L A K P V L H G A V I P M S A P I E E V V R S S A Y G D G W
A1DMA1|ATG5_NEOFI|10-326  -----R T P V L A K P V L H G A A V P M S A P I E E L V R S C A Y G D G W
Q3MQ04|ATG5_PIG|1-275  -----D G E K K S Q V M I H G I E P L L E T P L Q W L S E H L S Y P D N F
D6W8J7|D6W8J7_TRICA|1-263  -----K - - N V V I K T H G M I P P L E T P L Q W M S E H L S Y P D N F
Q12380|ATG5_YEAST|1-287  -----I N G N D V M V I C Q G I E I P W H M L L Y D L Y S K L R S F D G F
Q3MQ21|Q3MQ21_CALSI|1-269  -----L S Q E G D R V V I Q G I E V P H D T P L Q W L S E H L S Y P D N F
B7TZ42|B7TZ42_BOMMO|1-264  -----E K S N V N L R T H G V I I P E T P L Q W L S E H L S Y P D N F
O74971|ATG5_SCHPO|4-261  -----C D K F L I V K P V I H G I T I F L Q S V L D E L N R D F C Y I D G F
Q59VY1|ATG5_CANAL|4-278  -----S S S M S H P Y I Q G I D V T S L M N Q S I R E I W L F K H L D
Q99J83|ATG5_MOUSE|1-275  -----D G E K R S Q V M I H G I E P M L E T P L Q W L S E H L S Y P D N F
A3LR68|ATG5_PICST|3-282  -----E A I A L P Y I H G I D T Q S L L D E P L L K T W E I F K H L D
Q3MQ09|Q3MQ09 ICTPU|1-275  -----D D P K Y Q V V I H G I E P L F E T P I Q W L S E H L S Y P D N F
A1CE93|ATG5_ASPCL|4-321  -----R T P V L A K P V L H G A A V P M S A P V E E V A R S A A Y G D G W
Q7QGY1|Q7QGY1_ANOGA|1-265  -----V R K A V E A R T H G V T V P E S T P L Q W L S E H L S Y P D N F
C3ZNT2|C3ZNT2_BRAFL|1-261  -----E D T S G S W K V V I Q G V E P P M E T P V Q W L S E H F S Y P D N F
Q0CRF3|ATG5_ASPTN|4-315  -----R T P V L A K P V L H G A V L P M S A P V E E V R S S A Y G D G W
Q6CKE2|ATG5_KLULA|1-271  -----T - - - - N R A I I Q G I V I C S D E D I I N L Y D L F A S I D G F

```

```

E9H8N6|E9H8N6_DAPPU|1-271  L H L C I R Y S Q T -
Q1DP17|ATG5_COCIM|5-351  L G V V V S M V G - -
Q9W3R7|ATG5_DROME|1-269  L H L S V D Y K D V -
Q4WNA5|ATG5_ASPFU|10-326  V Y I V I R M M G - -
A6RE26|ATG5_AJECN|5-333  L A I V V S M V G - -
E2BV18|E2BV18_HARSA|1-265  L H L I V V T S - - -
Q3MQ02|Q3MQ02_XENLA|1-276  L H I S I I P Q P T D
Q3MQ23|Q3MQ23_CIOSA|1-266  L H I C V R Q P I N R
Q75BY9|ATG5_ASHGO|1-288  L H I S I C S P V A L
Q3MQ11|Q3MQ11_GASAC|1-275  L H I C V I P V P S R
Q9FFI2|ATG5_ARATH|1-336  L H I S V L V K A P Q
C1BTY2|C1BTY2_9MAXI|1-273  L H I C V K - - - -
E0VWT9|E0VWT9_PEDHC|1-266  L H L I C T T L Q - -
A7KAI4|ATG5_PICAN|1-275  L H I S I K M I Q K N
Q6BVI8|ATG5_DEBHA|4-288  N F L Y I I V L F S T
Q2UBM1|ATG5_ASPOR|4-322  L Y V V I R M M G - -
Q9HIY0|ATG5_HUMAN|1-275  L H I S I I P Q P T D
C4QII2|C4QII2_SCHMA|163-515  V H I V A R P Q S H S
A5DCZ3|ATG5_PICGU|1-258  N F L Y I I L M P - -
COHB55|COHB55_SALSA|1-275  L H I S I I P A P S D
Q3MQ08|Q3MQ08_ORYLA|1-275  L H I C I I P A P T D
F1RDC0|F1RDC0_DANRE|2-275  L H I S I I P A P S D
Q17IN4|Q17IN4_AEDAE|1-265  L H L C L I Y G - - -
A7SNR5|A7SNR5_NEMVE|1-276  L H I V V V S N E - -
A7TS83|ATG5_VANPO|1-290  L H L S I C M V T D D
C1BN90|C1BN90_9MAXI|1-274  L H I S V K - - - -
P0CM36|ATG5_CRYNE|8-339  V R V G V C L S A A -
Q0UXN8|ATG5_PHANO|4-311  L H I A I V M M G - -
A7KAL6|ATG5_PENCW|4-317  A Y I V V R M M G - -
A1DMA1|ATG5_NEOFI|10-326  A Y I V I R M M G - -
Q3MQ04|ATG5_PIG|1-275  L H I S I V P Q P T D
D6W8J7|D6W8J7_TRICA|1-263  L H L C V Q T - - -
Q12380|ATG5_YEAST|1-287  L Y I T L V P I K G G
Q3MQ21|Q3MQ21_CALSI|1-269  L T S A T F L S S L E
B7TZ42|B7TZ42_BOMMO|1-264  L H L C L C - - - -
O74971|ATG5_SCHPO|4-261  L H I V L M K V - - -
Q59VY1|ATG5_CANAL|4-278  N F L Y I T L I L -
Q99J83|ATG5_MOUSE|1-275  L H I S I V P Q P T D
A3LR68|ATG5_PICST|3-282  N F L Y V V V I P R V
Q3MQ09|Q3MQ09 ICTPU|1-275  L H I C I I P A P N D
A1CE93|ATG5_ASPCL|4-321  V Y I V V R M M G - -
Q7QGY1|Q7QGY1_ANOGA|1-265  L H L C L S Y A - - -
C3ZNT2|C3ZNT2_BRAFL|1-261  L H I C L V N S R - -
Q0CRF3|ATG5_ASPTN|4-315  V Y I V V R M M G - -
Q6CKE2|ATG5_KLULA|1-271  L Y V V I K - - - -

```

|          |   |   |         |   |   |           |   |   |
|----------|---|---|---------|---|---|-----------|---|---|
| 1        | 2 | 3 | 4       | 5 | 6 | 7         | 8 | 9 |
| Variable |   |   | Average |   |   | Conserved |   |   |

✘ - Insufficient data - the calculation for this site was performed on less than 10% of the sequences.

**Supplementary Figure 5** Multiple sequence alignments of ATG12 and ATG5 family members used for ConSurf analyses in **Figure 3**. Each sequence is labeled with its UniProtKB, entry name for Uniprot, and residue range at the left, middle, and right, respectively, in the left column. Fifty and 45 sequences of ATG12 and ATG5, respectively, were used to generate the multiple sequence alignments.



## Supplementary Note

### **Cloning, expression and purification of recombinant proteins.**

ATG3: The full-length ATG3 coding DNA sequence was cloned into the BamHI-XhoI site of a glutathione S-transferase (GST)-fusion vector modified from pGEX4T3 (GE).

Protein expression was induced by the addition of 0.2 mM IPTG to transformed BL21 ( $\lambda$ DE3) cells growing in LB media at an OD<sub>600</sub> of 0.8, after which the cells were grown at 18°C for 12–16 hours and then harvested. The protein was purified by glutathione affinity and Source 15Q (GE) anion-exchange chromatography followed by TEV cleavage and passage over a SD200 column.

ATG12: The ATG12<sub>52–140</sub> coding DNA sequence was subcloned into pTXB1 (NEB) using NdeI and BspQI and then was transferred to a modified pET-Duet-1 vector using NdeI and BamHI; the resulting vector expresses the 6×His-MBP-TEVs-ATG12<sub>52–140</sub>-intein-chitin binding domain fusion.

Protein expression was performed as described for ATG3. The fusion protein was purified by chitin affinity (NEB) and SD200 size-exclusion chromatography followed by dithiothreitol (DTT)-induced intein cleavage according to the manufacturer's instructions (NEB). The cleaved protein was further purified on a Source 15S column. The 6×His-MBP tag was removed by TEV protease, and the protein was further purified on Source 15S and Superdex 75 (GE) gel-filtration columns. Because ATG12 tended to aggregate over time, the purified protein was used within 2 days after the final gel-filtration step.

The ATG5–ATG16N complex: The full-length ATG5 coding DNA sequence was cloned into a 6×His-MBP vector based on pET Duet-1. The fusion protein was expressed as described for ATG3. The 6×His-MBP-TEVs-ATG5 fusion protein was purified by nickel affinity and SD200 size-exclusion chromatography, treated with TEV protease followed by Source 15Q anion-exchange and butyl sepharose (GE) hydrophobic chromatography.

The purified ATG5 was then complexed with 6×His-MBP-TEVs-ATG16N. Upon completion of TEV cleavage, the complex was further purified on

Source 15Q and SD200 columns. The ATG12-ATG5 fusion: The ATG12<sub>52–140</sub> and full-length ATG5 coding DNA sequences were joined with a linker coding

GlyGlySerGlyGlySer hexa-peptide by PCR and the resulting fusion sequence was cloned into a MBP-6×His vector modified from pET15b (Novagen). The fusion protein

was expressed, purified, and complexed with ATG16N as described for ATG5. The BMOE-cross-linked ATG12~ATG5 conjugate mimic: The ATG12<sub>52-140</sub><sup>C122N C134S G140C</sup> and ATG5<sup>C19Q C115L C128S C223L K130C</sup> mutant proteins were purified as described above for the wild-type of each protein. The purified proteins were buffer-exchanged into 20 mM Hepes, pH 7.5, 300 mM NaCl, and 5 mM EDTA and then mixed at a concentration of ~250 μM of each protein. A 1.5-fold molar excess of BMOE (Pierce) was added to the protein solution, which was then incubated at room temperature for 2 hours. The reaction was quenched by the addition of 10 mM DTT. The reaction solution was mixed with the 6×His-MBP-TEVs-ATG16N protein, followed by purification as described for the wild-type ATG12~ATG5–ATG16N complex. ATG7: The full-length ATG7 coding DNA sequence was cloned into the NcoI-Sall site of a modified pFastBac1 vector (Invitrogen); the resulting vector expresses 6×His-TEVs-ATG7 in insect cells. The baculovirus was generated using Bac-to-Bac Baculovirus Expression System (Invitrogen) with this vector and protein expression was carried out in Sf9 (*Spodoptera frugiperda*) cells at 27°C for 2.5 days. The expressed protein was purified by nickel affinity chromatography followed by passage over Source 15Q and SD200 columns. LC3B: The LC3B<sub>1-120</sub> (matured form) coding DNA sequence was cloned into the Nde-BamHI site of a GST-fusion vector modified from pGEX2T (GE). Protein expression was carried out as described for ATG3. LC3B was purified on glutathione-sepharose and Source 15S columns followed by TEV cleavage and SD200 size-exclusion chromatography.
